# Supplementary material for: Genome-wide analysis of microRNA targeting impacted by SNPs in cucumber genome
Source: PubMed Central journal article supplement (PMC5379521; doi:10.1186/s12864-017-3665-y), 2017-04-04

# 9930-specific targets for conserved and known miRNA

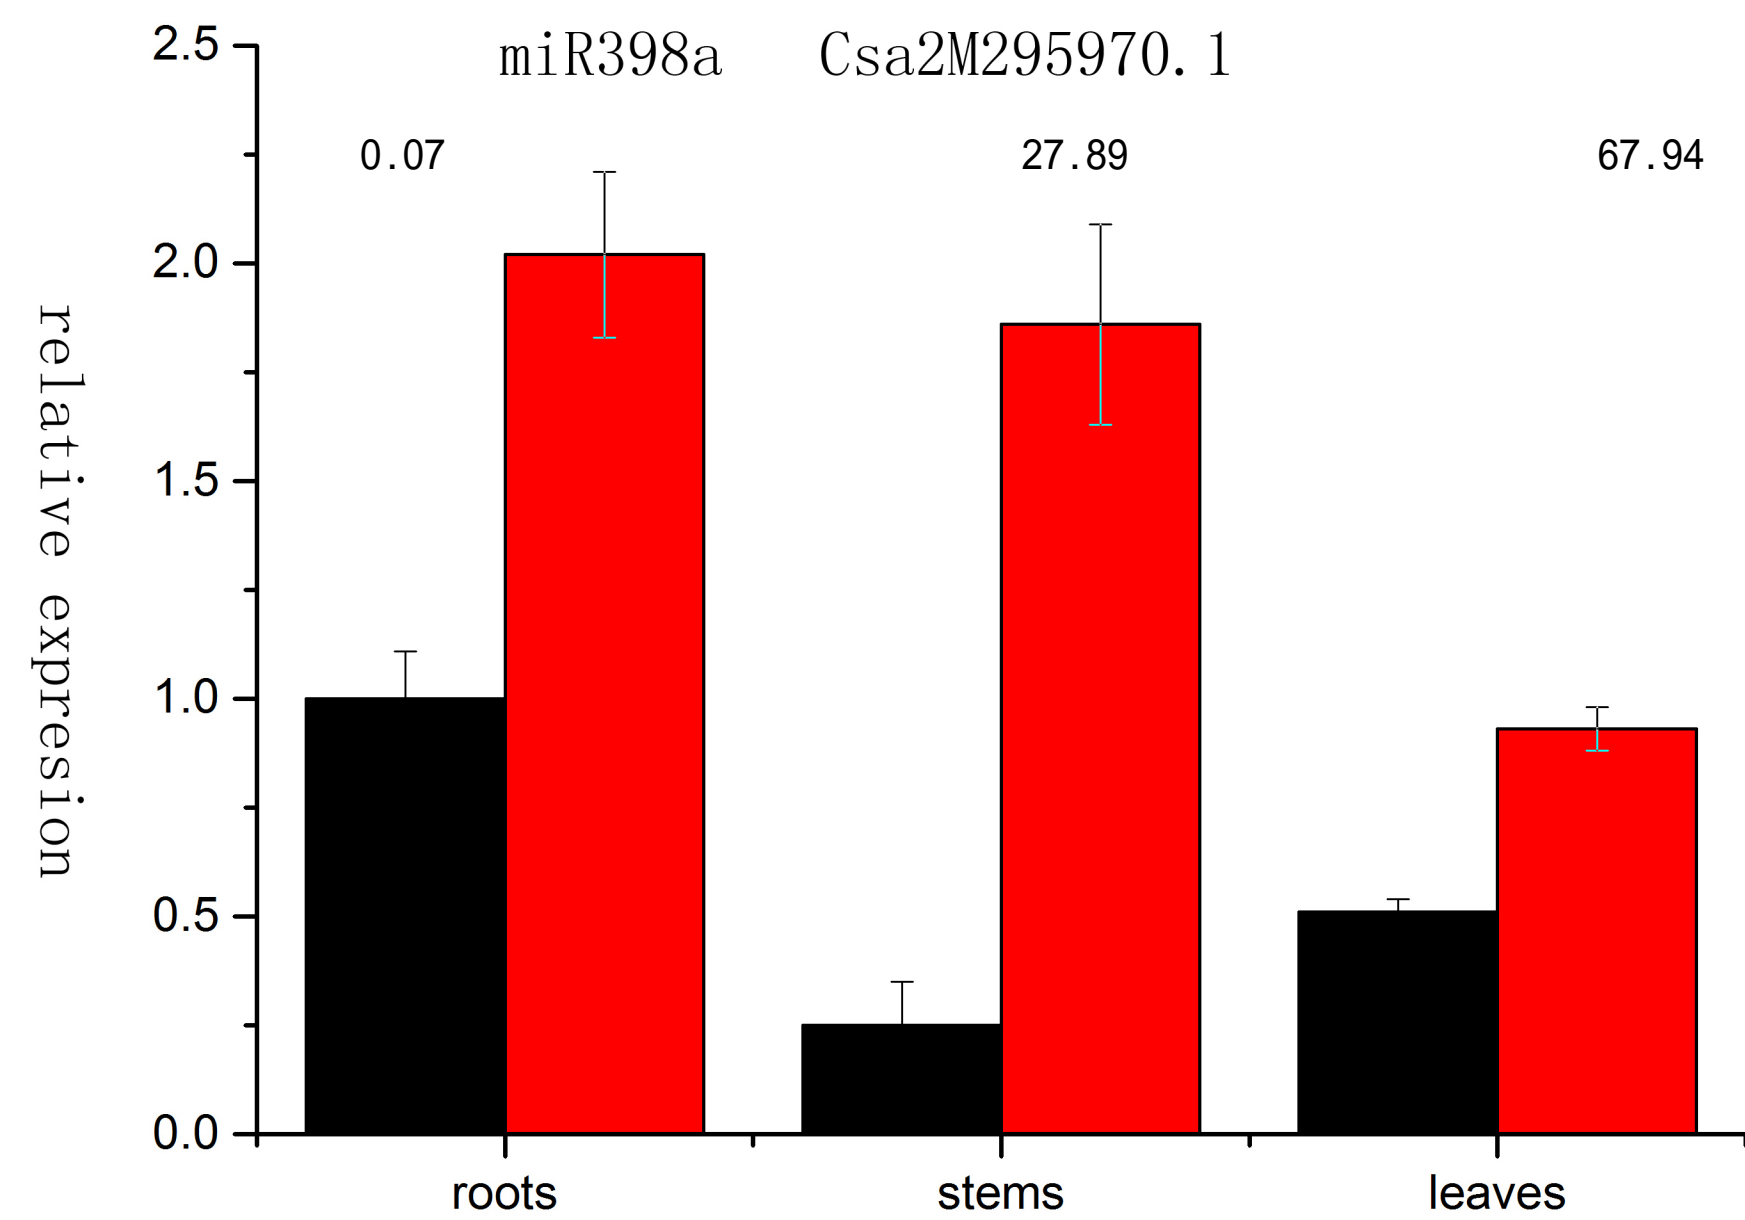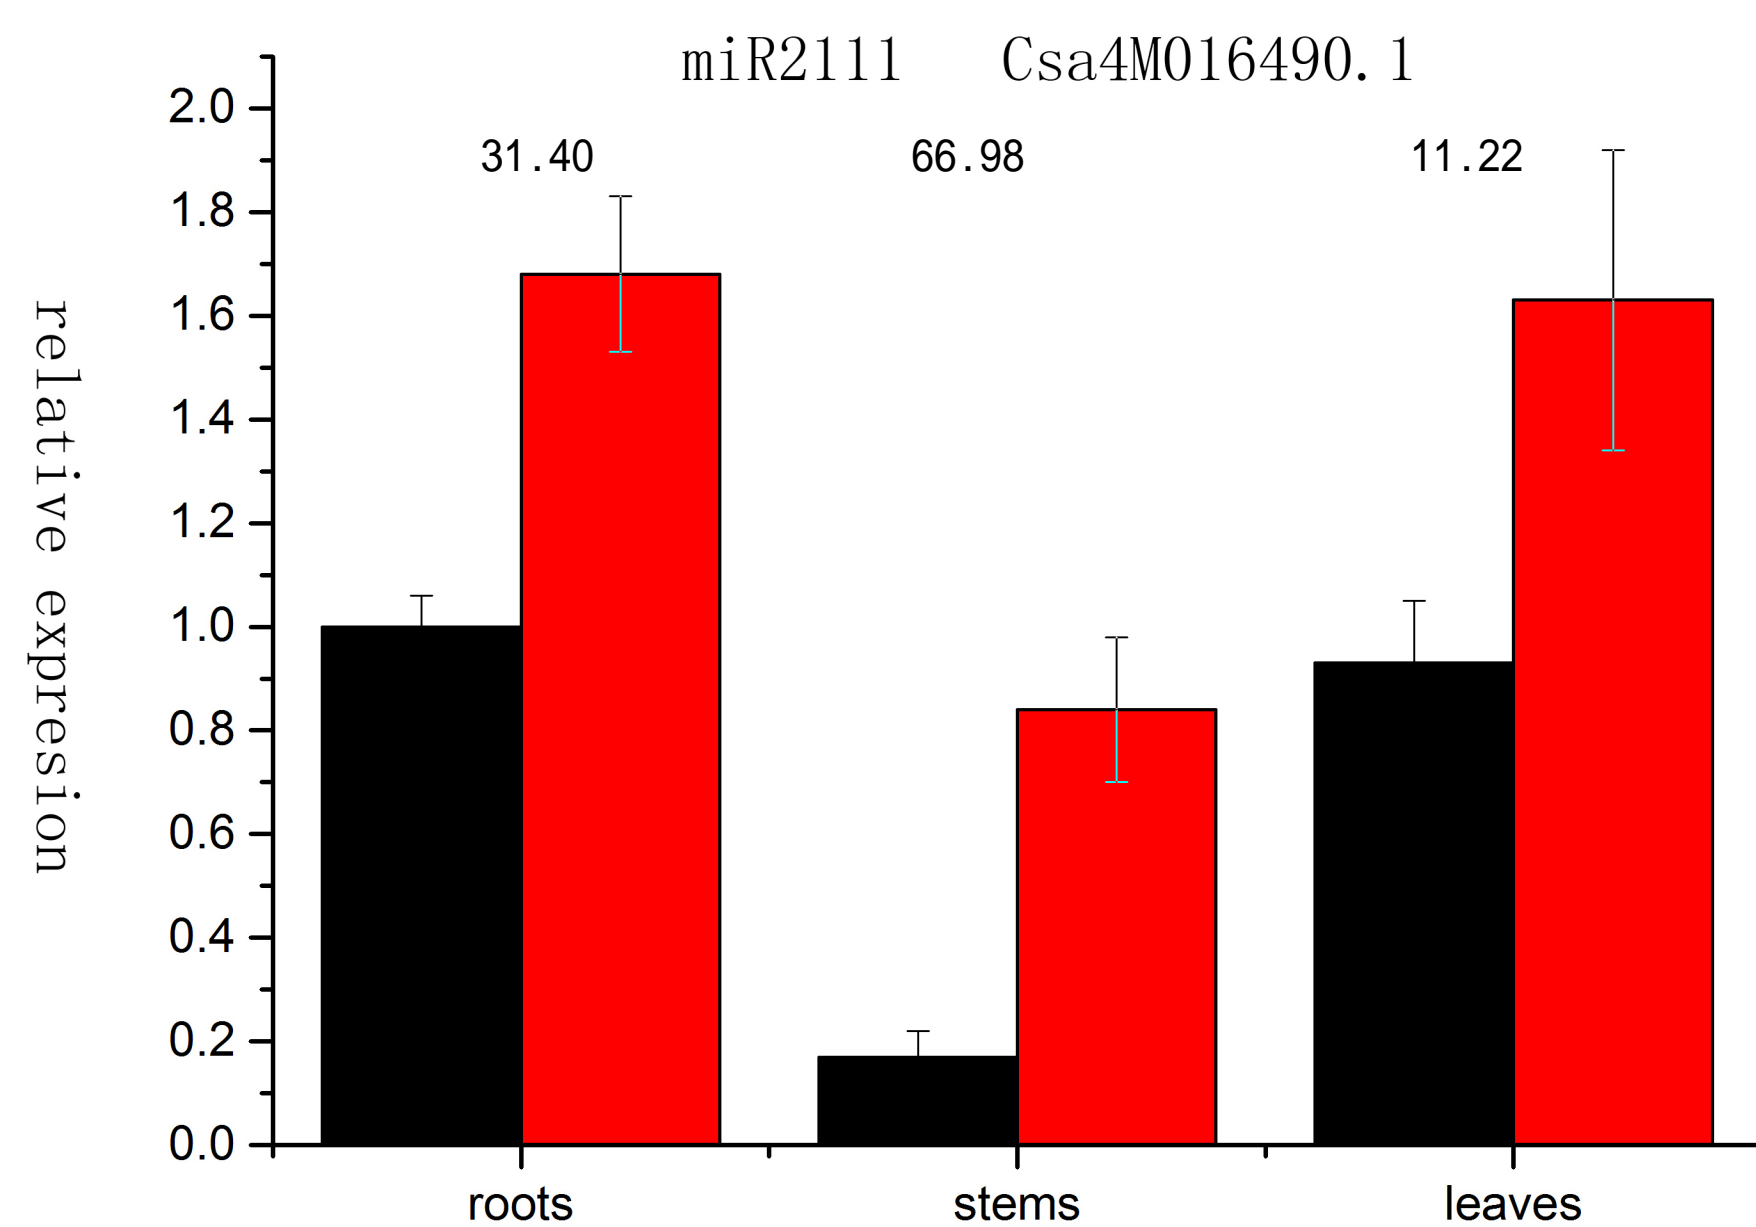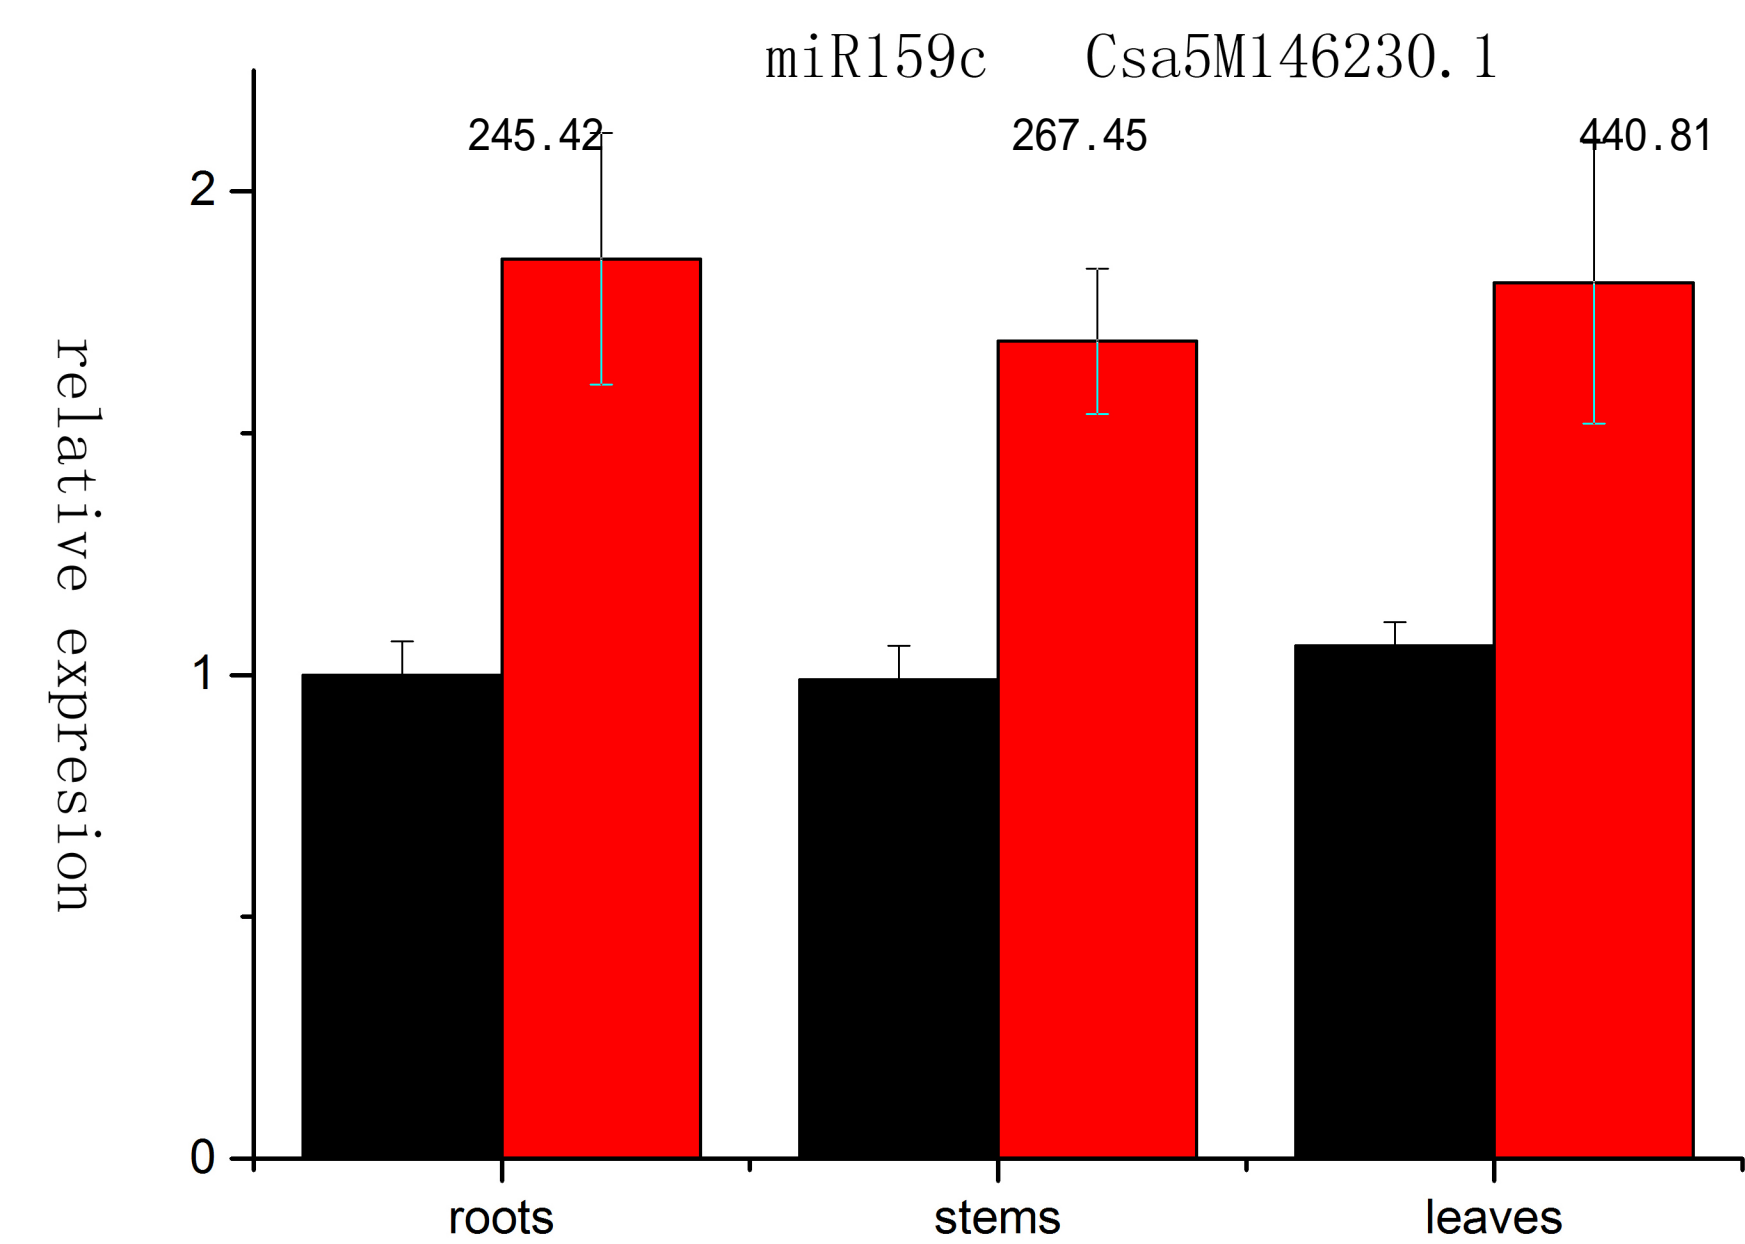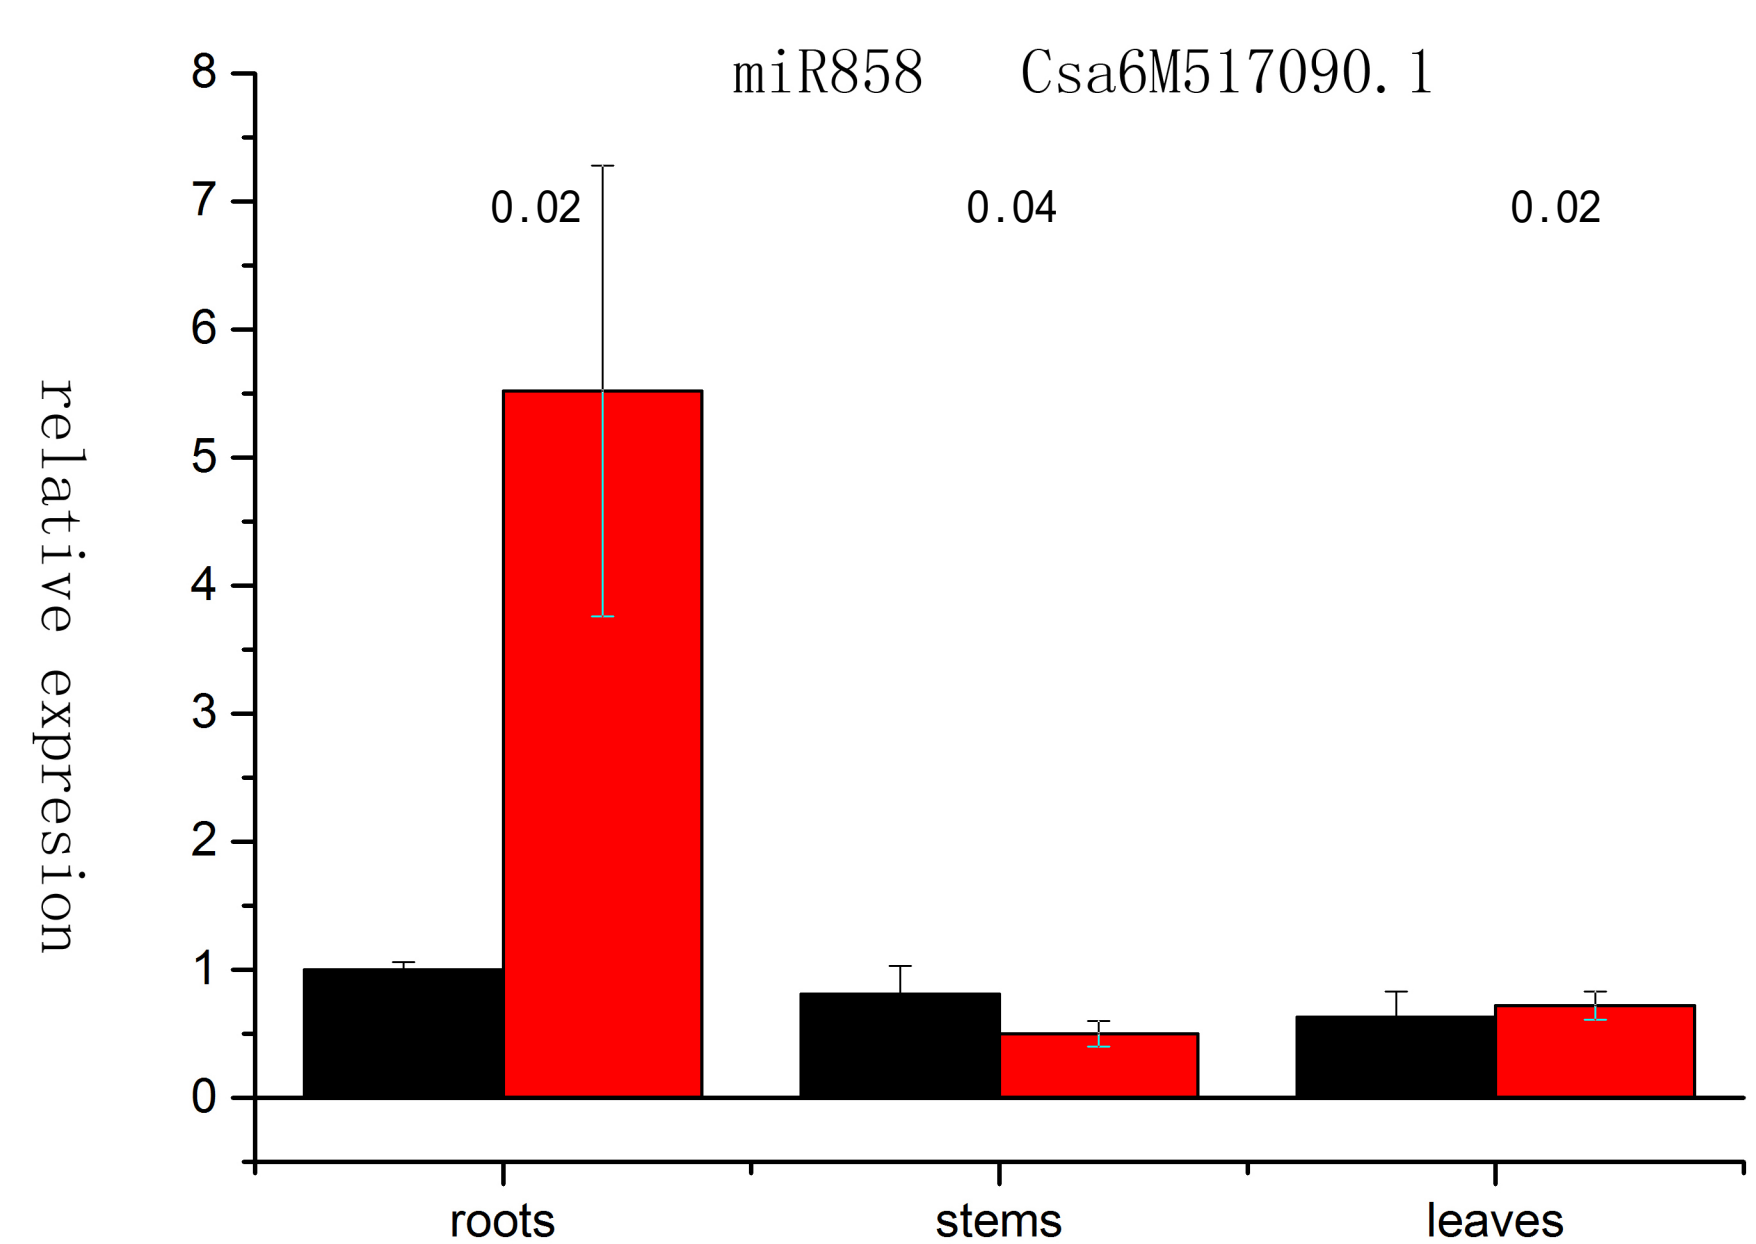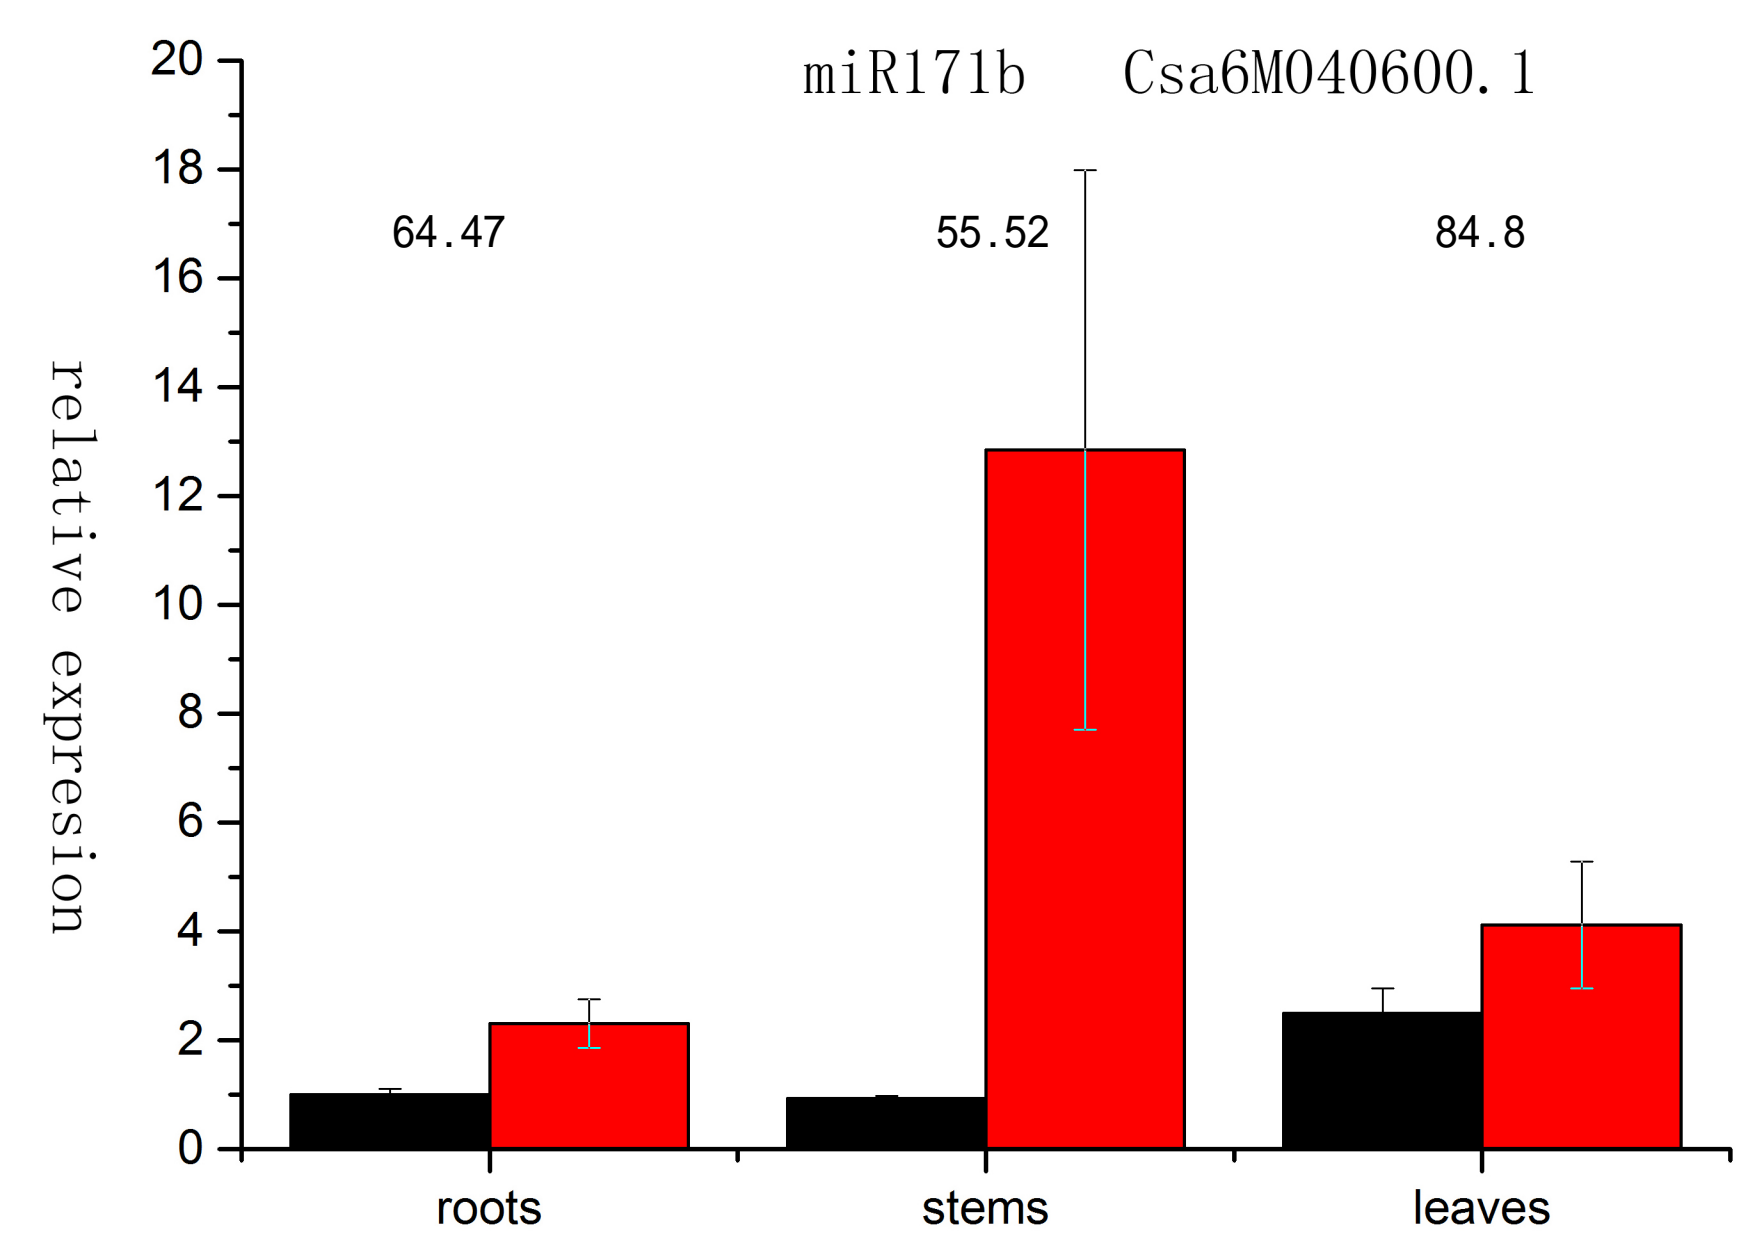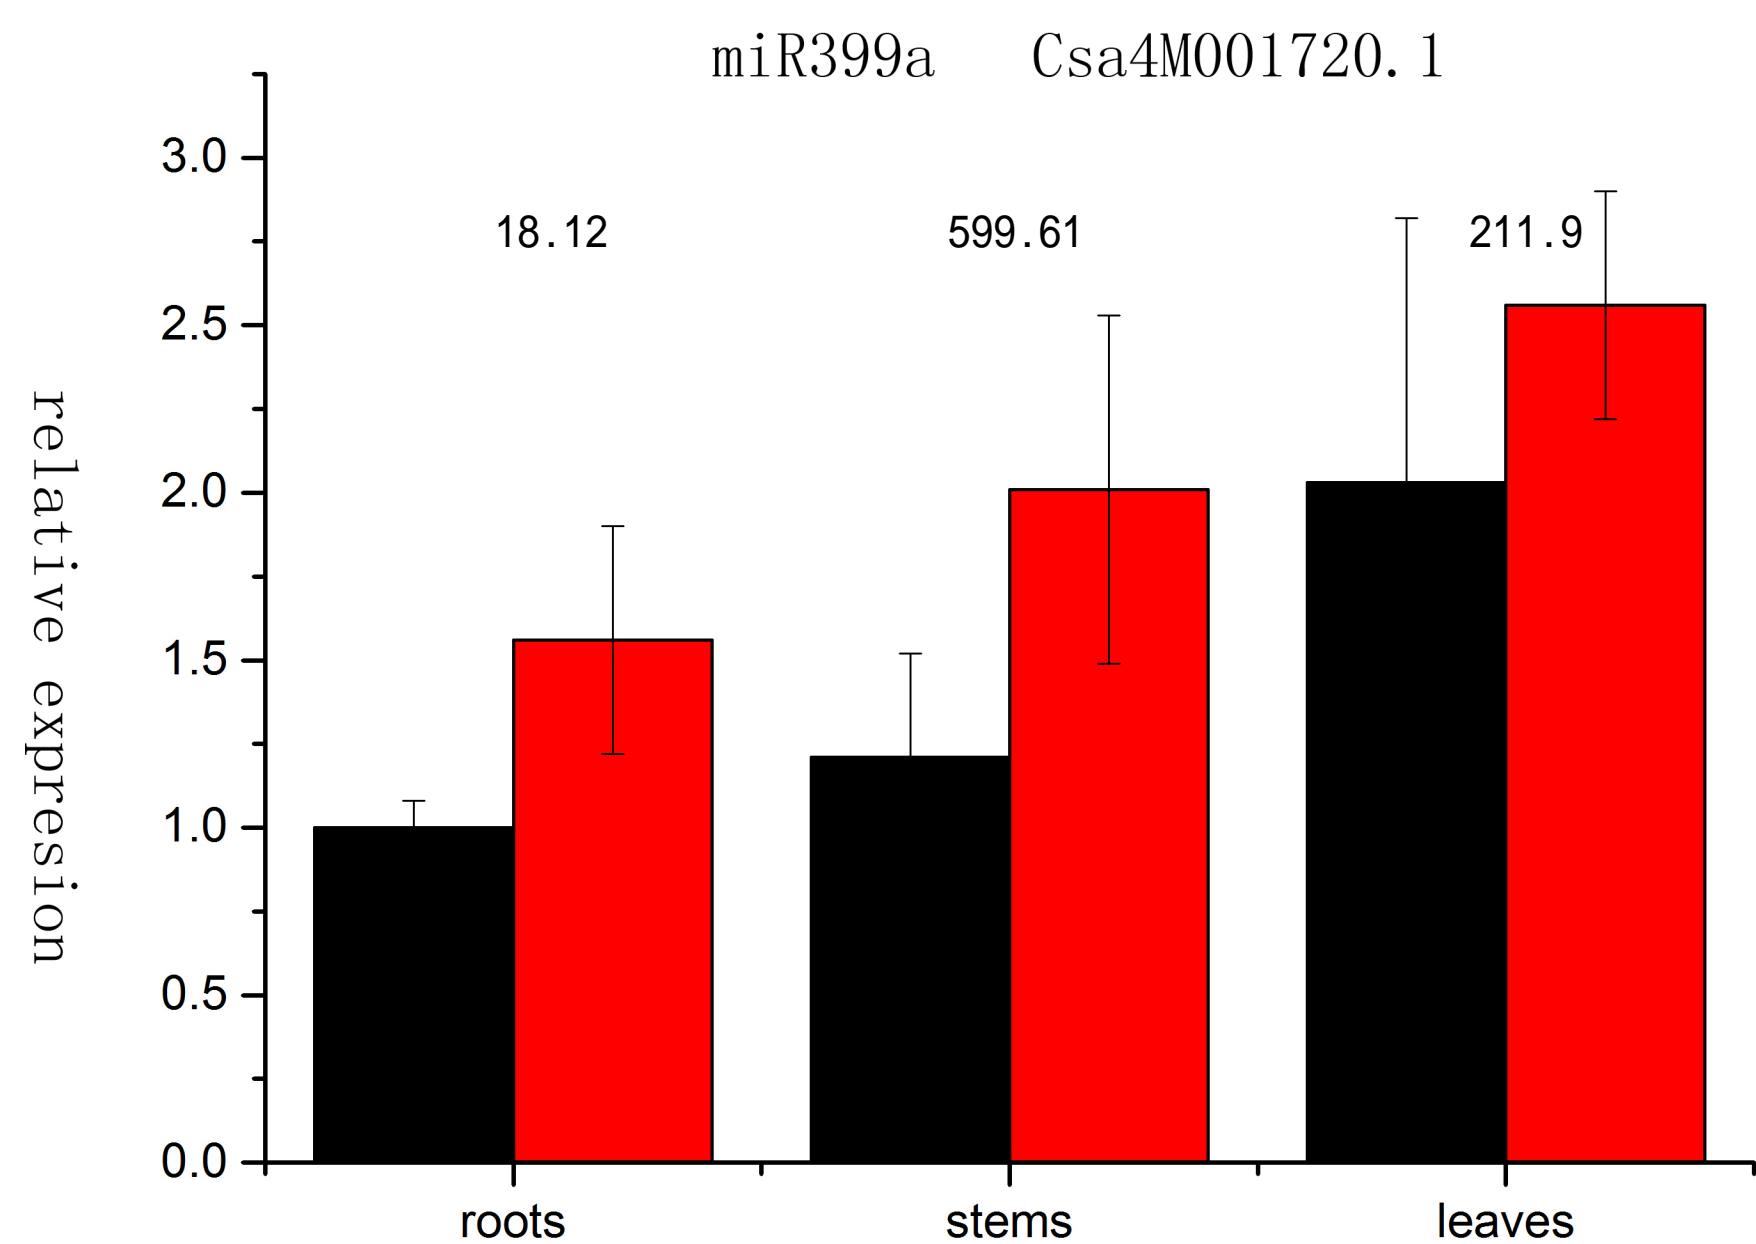

9930-specific targets for cucumber-specific miRNA

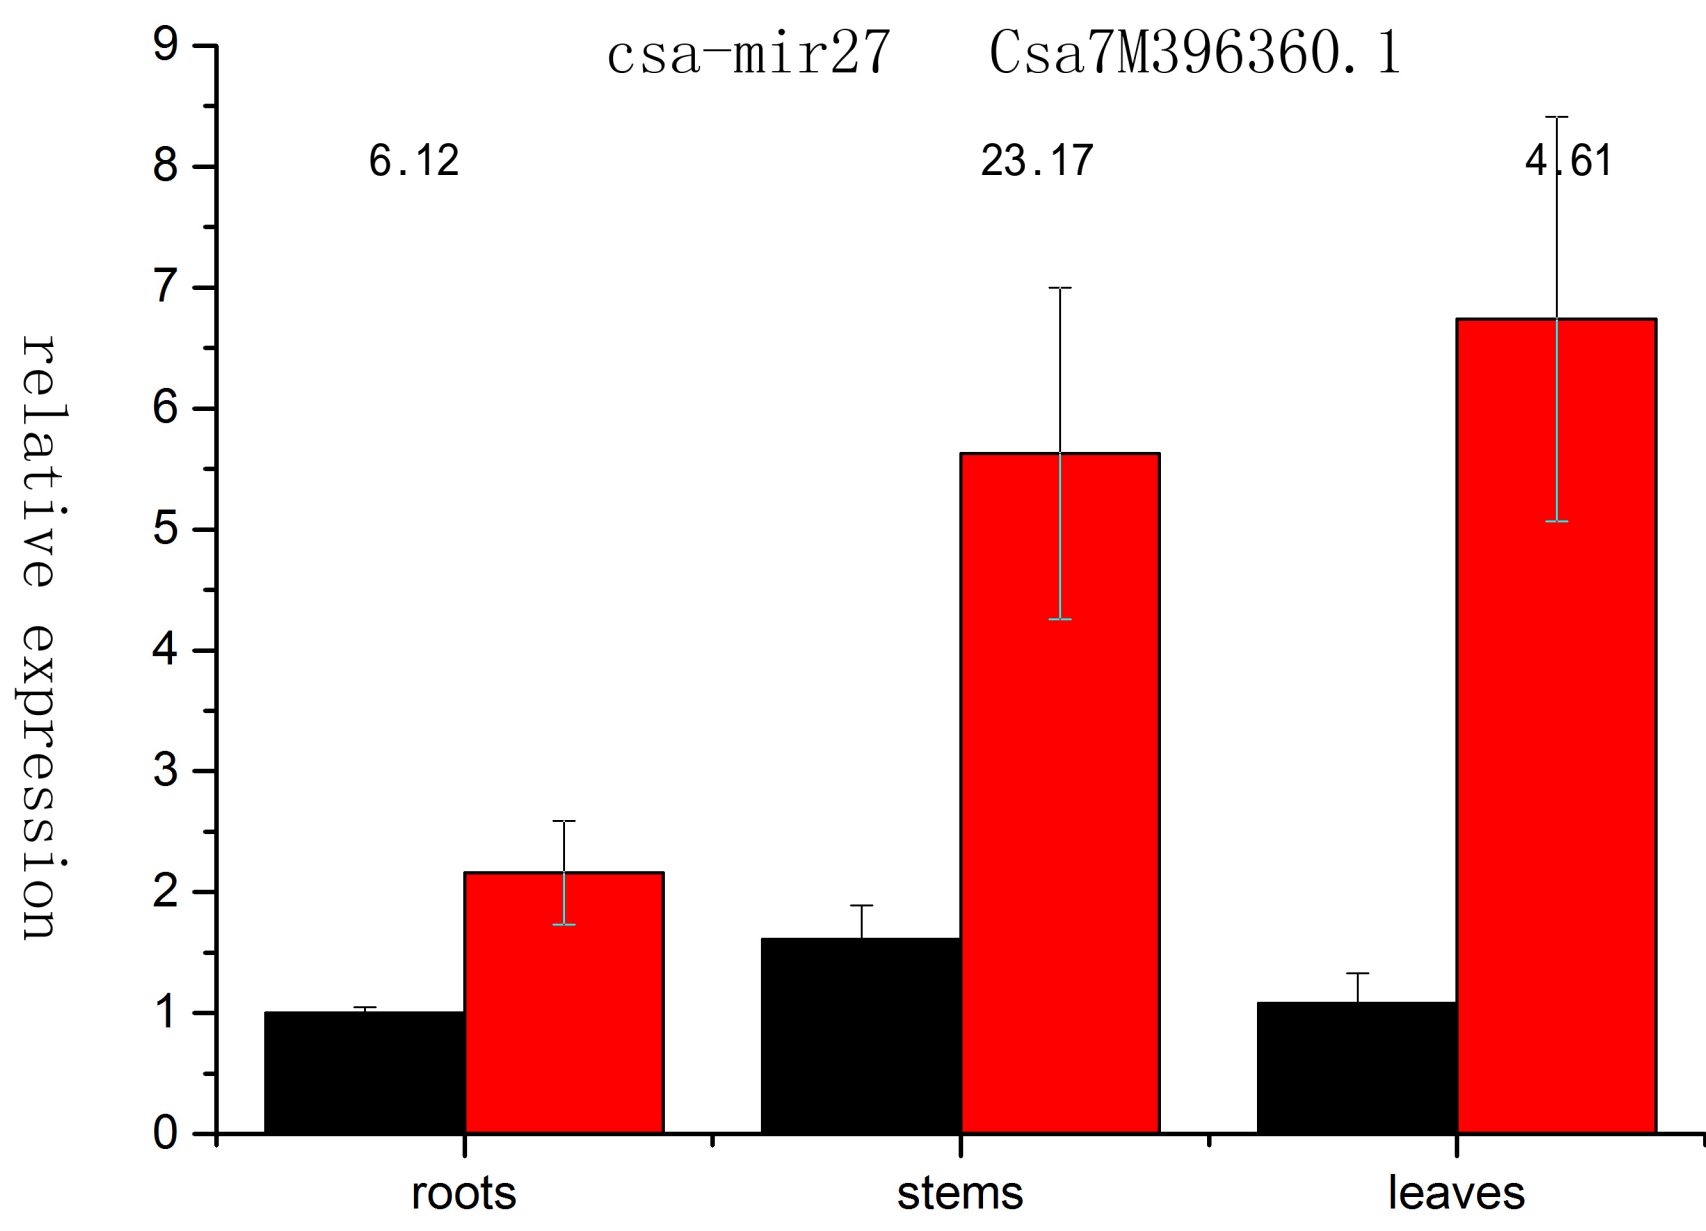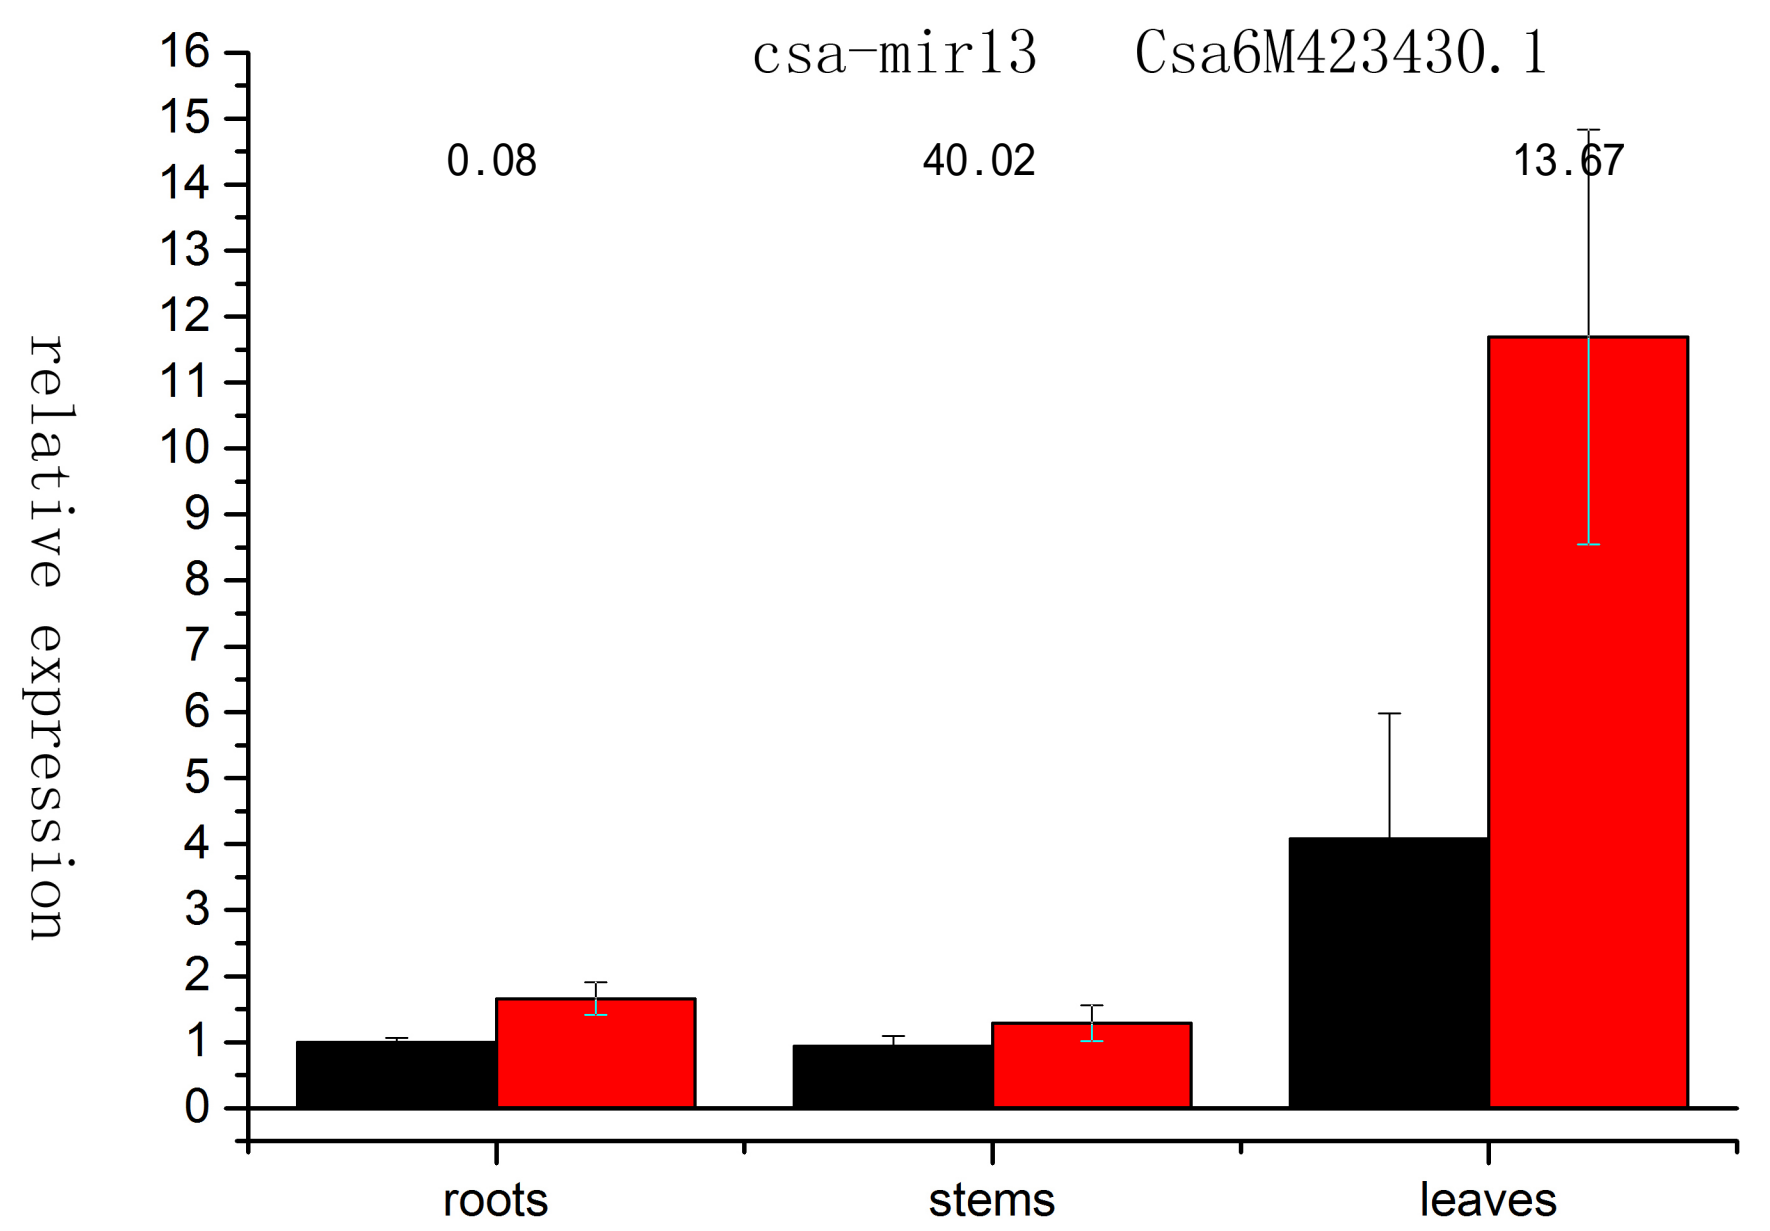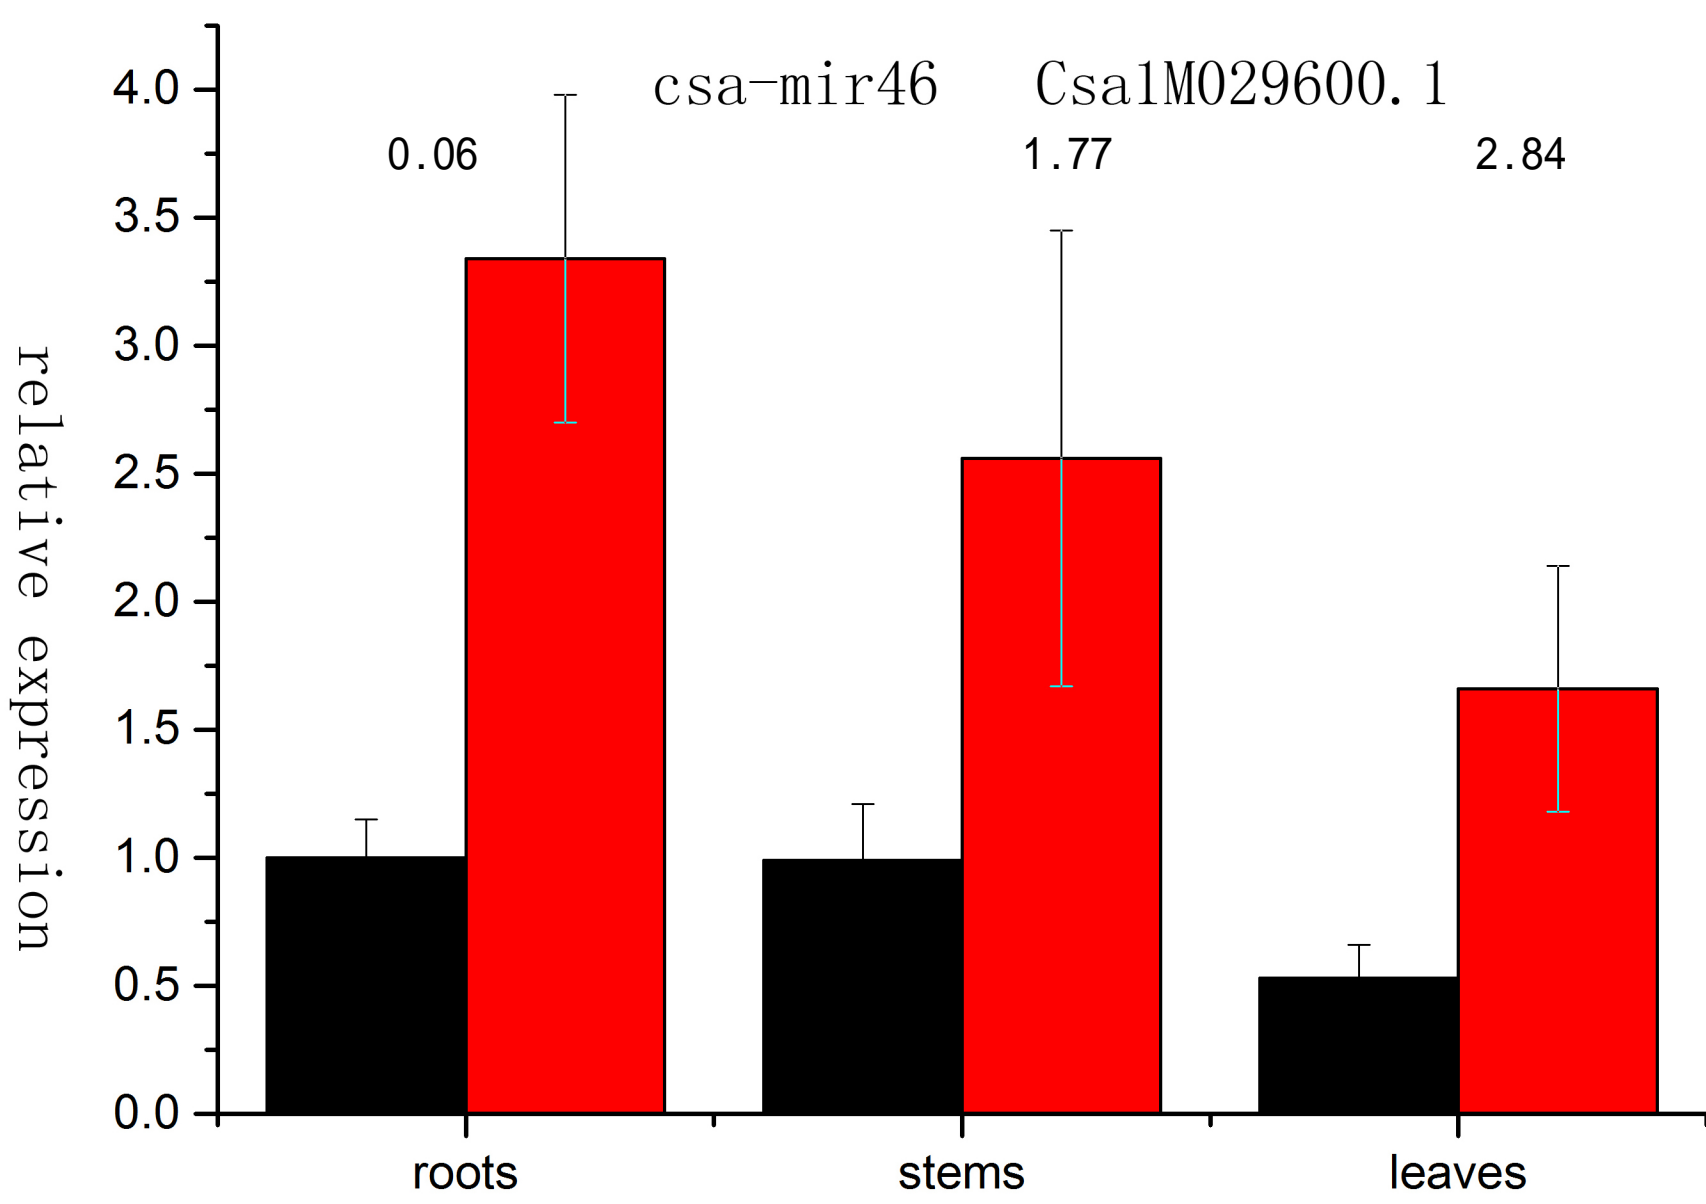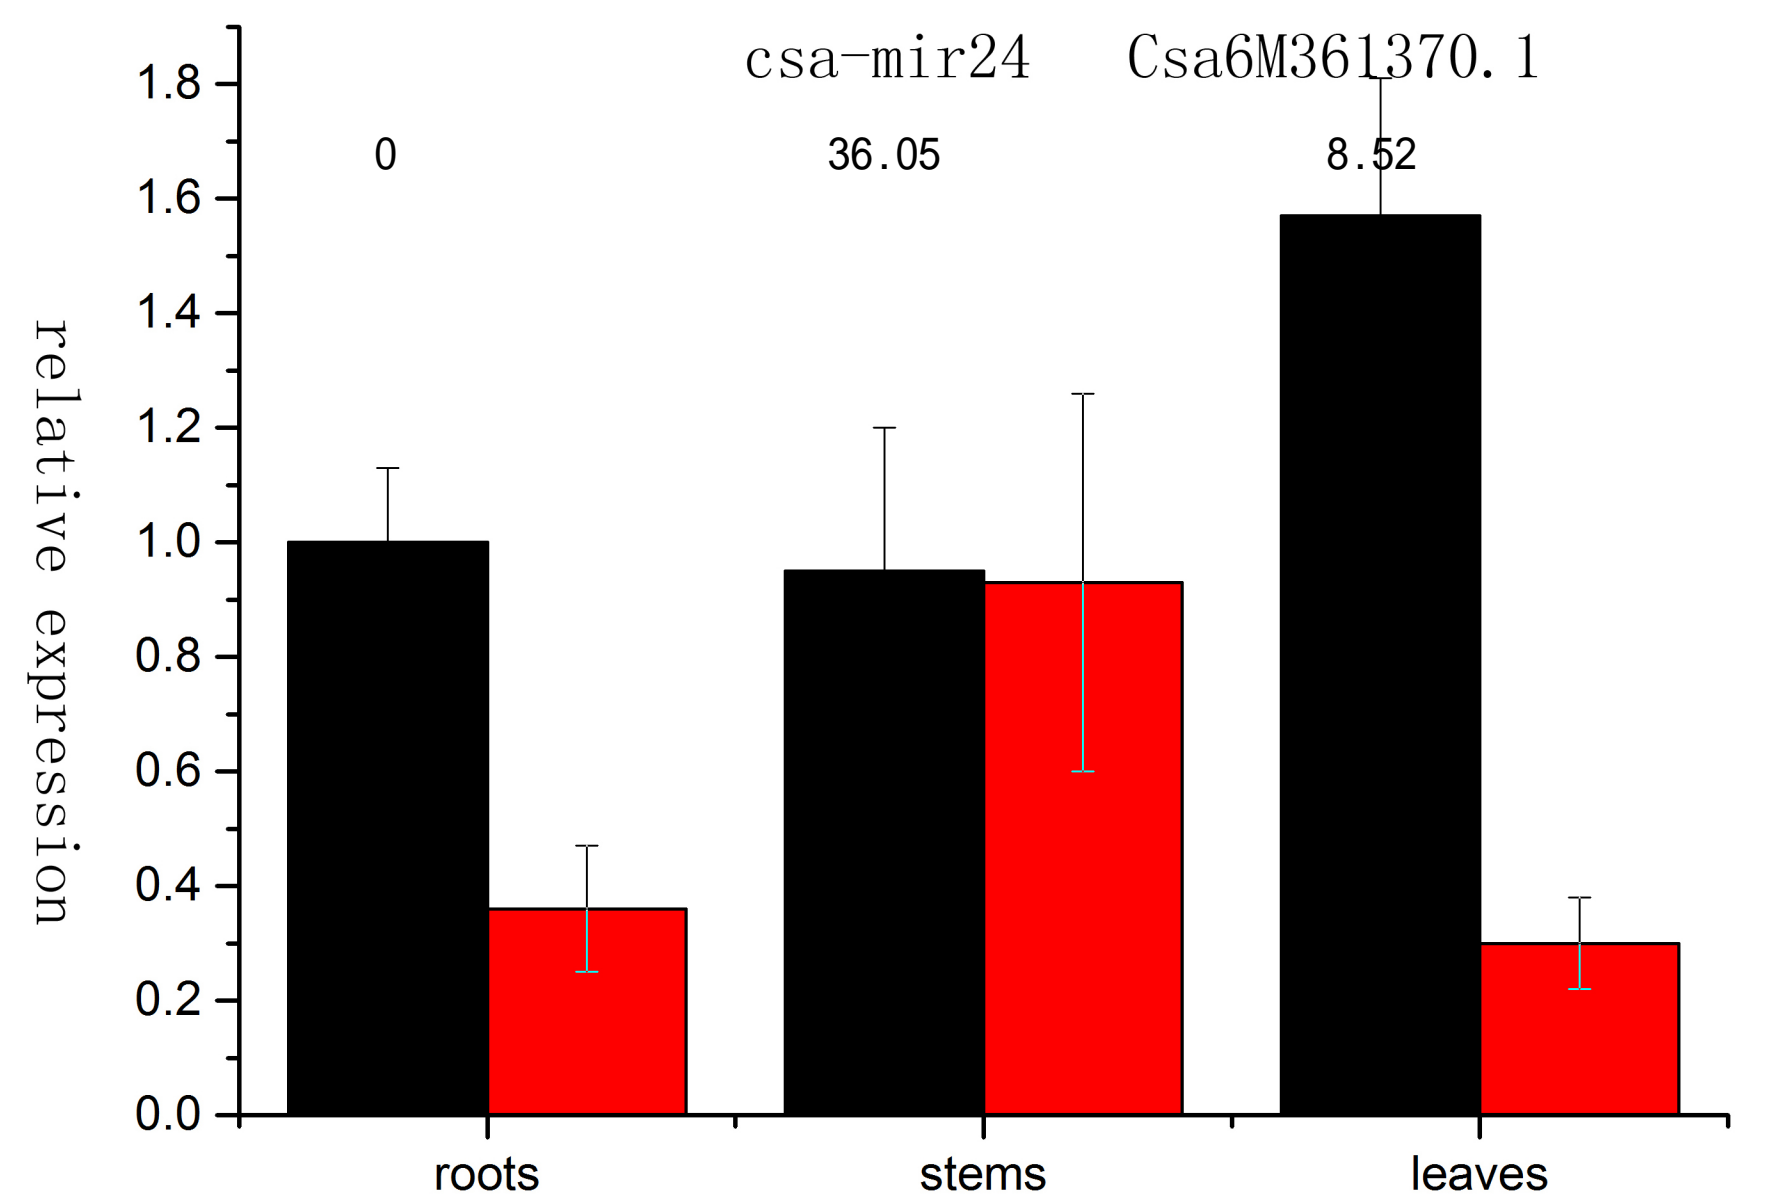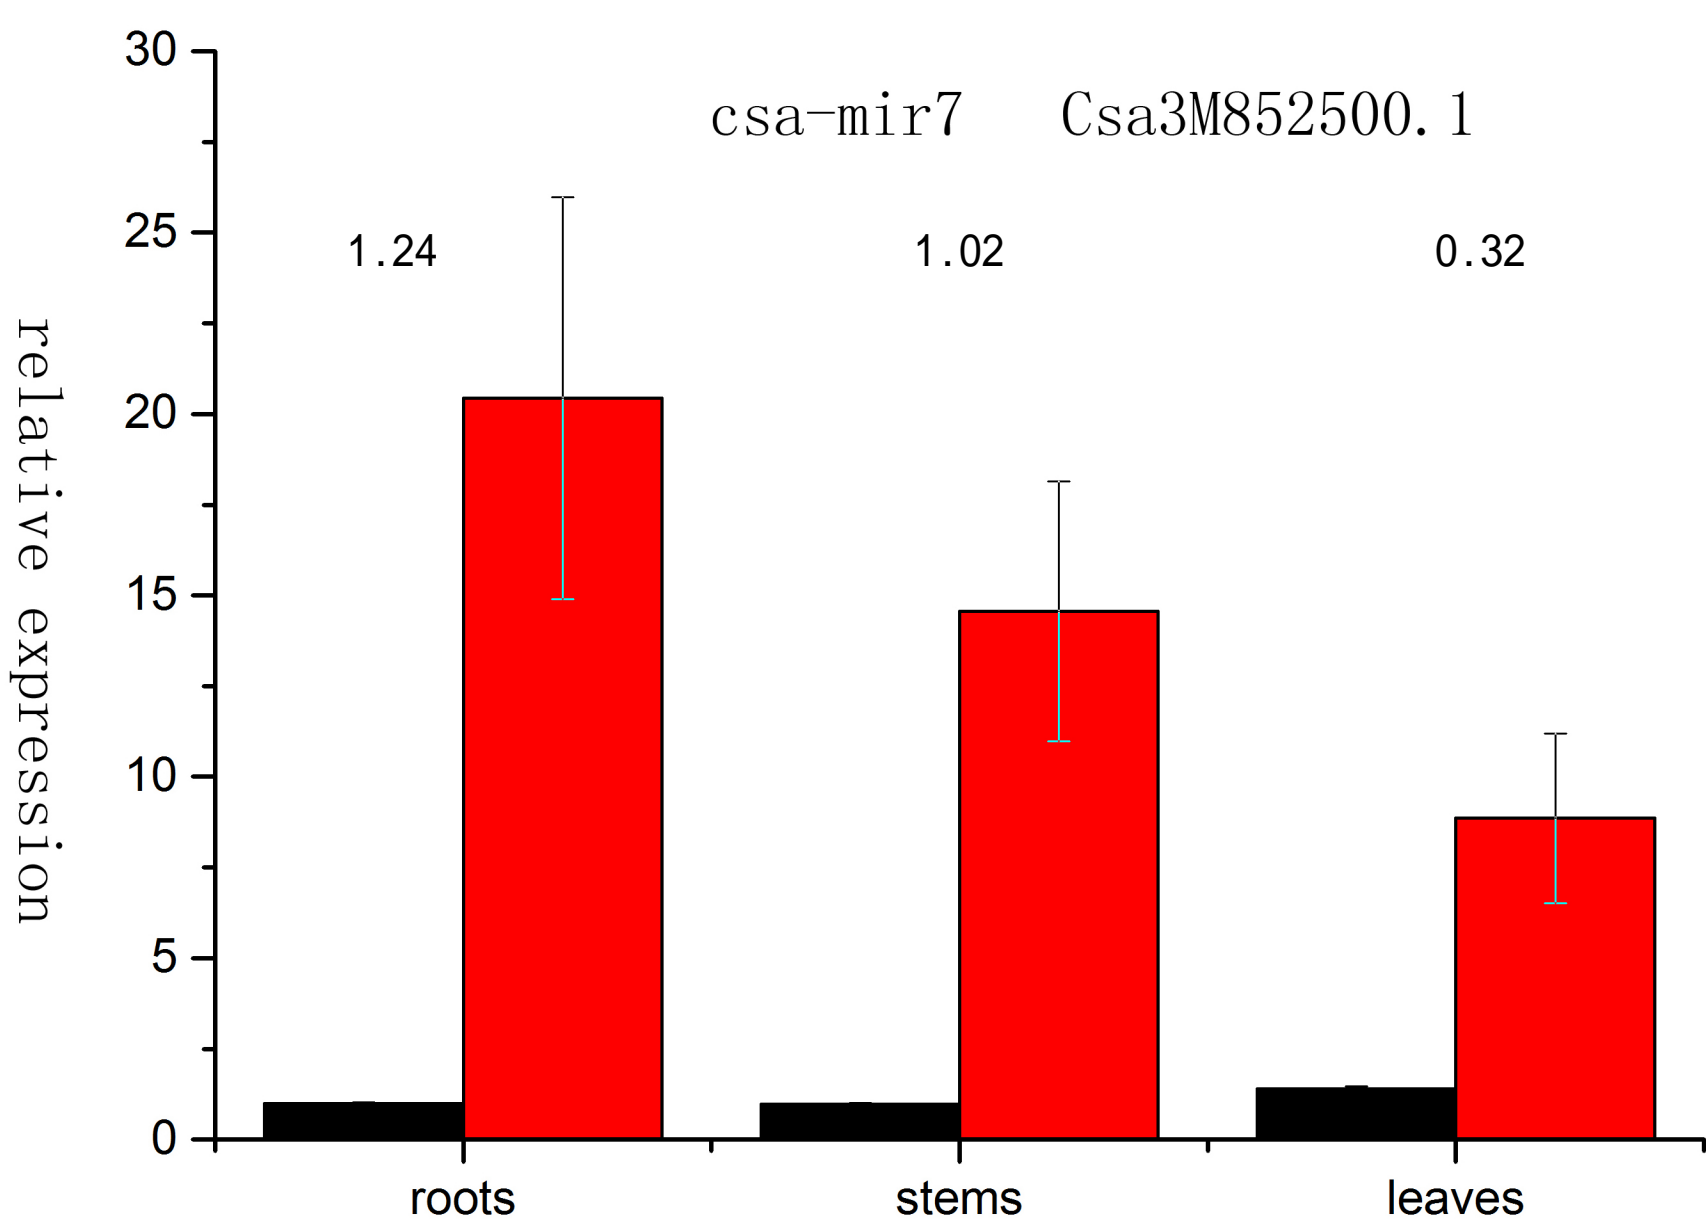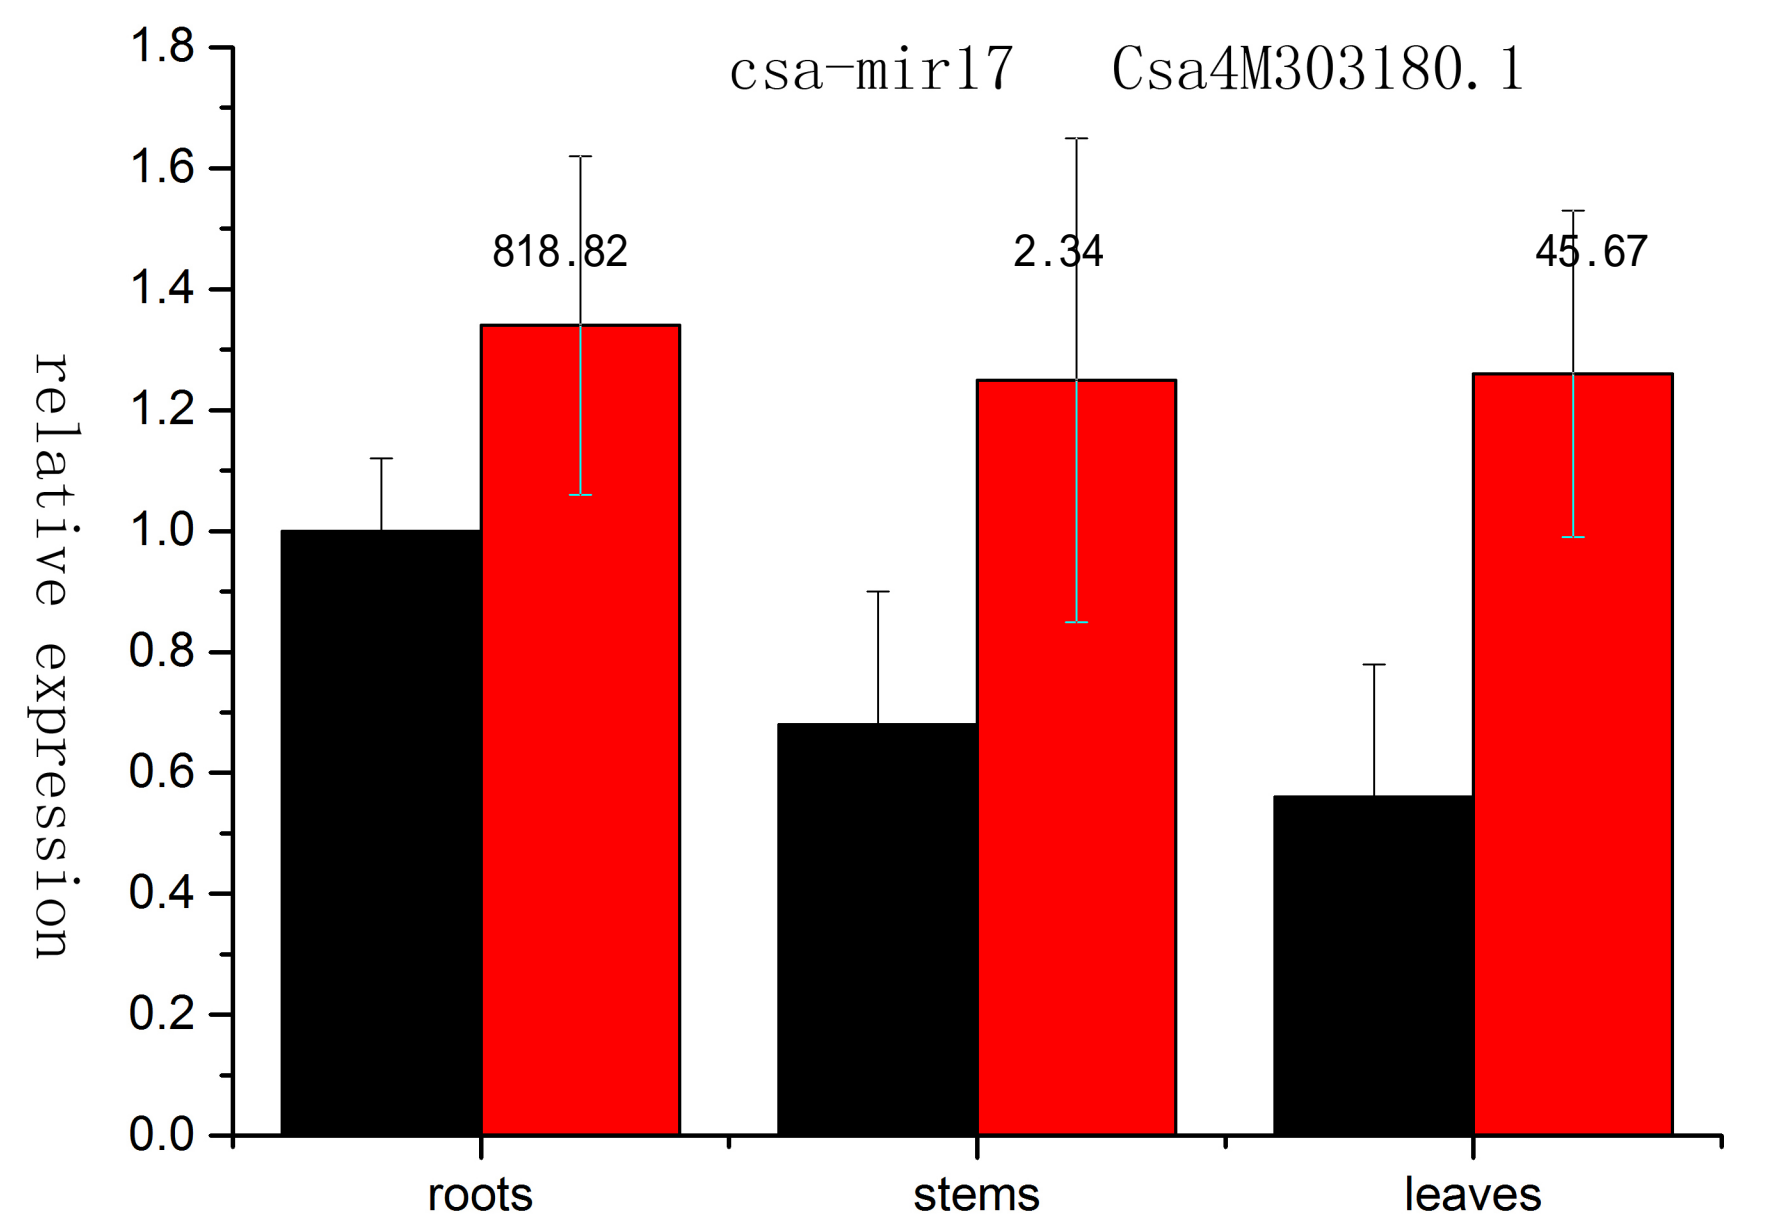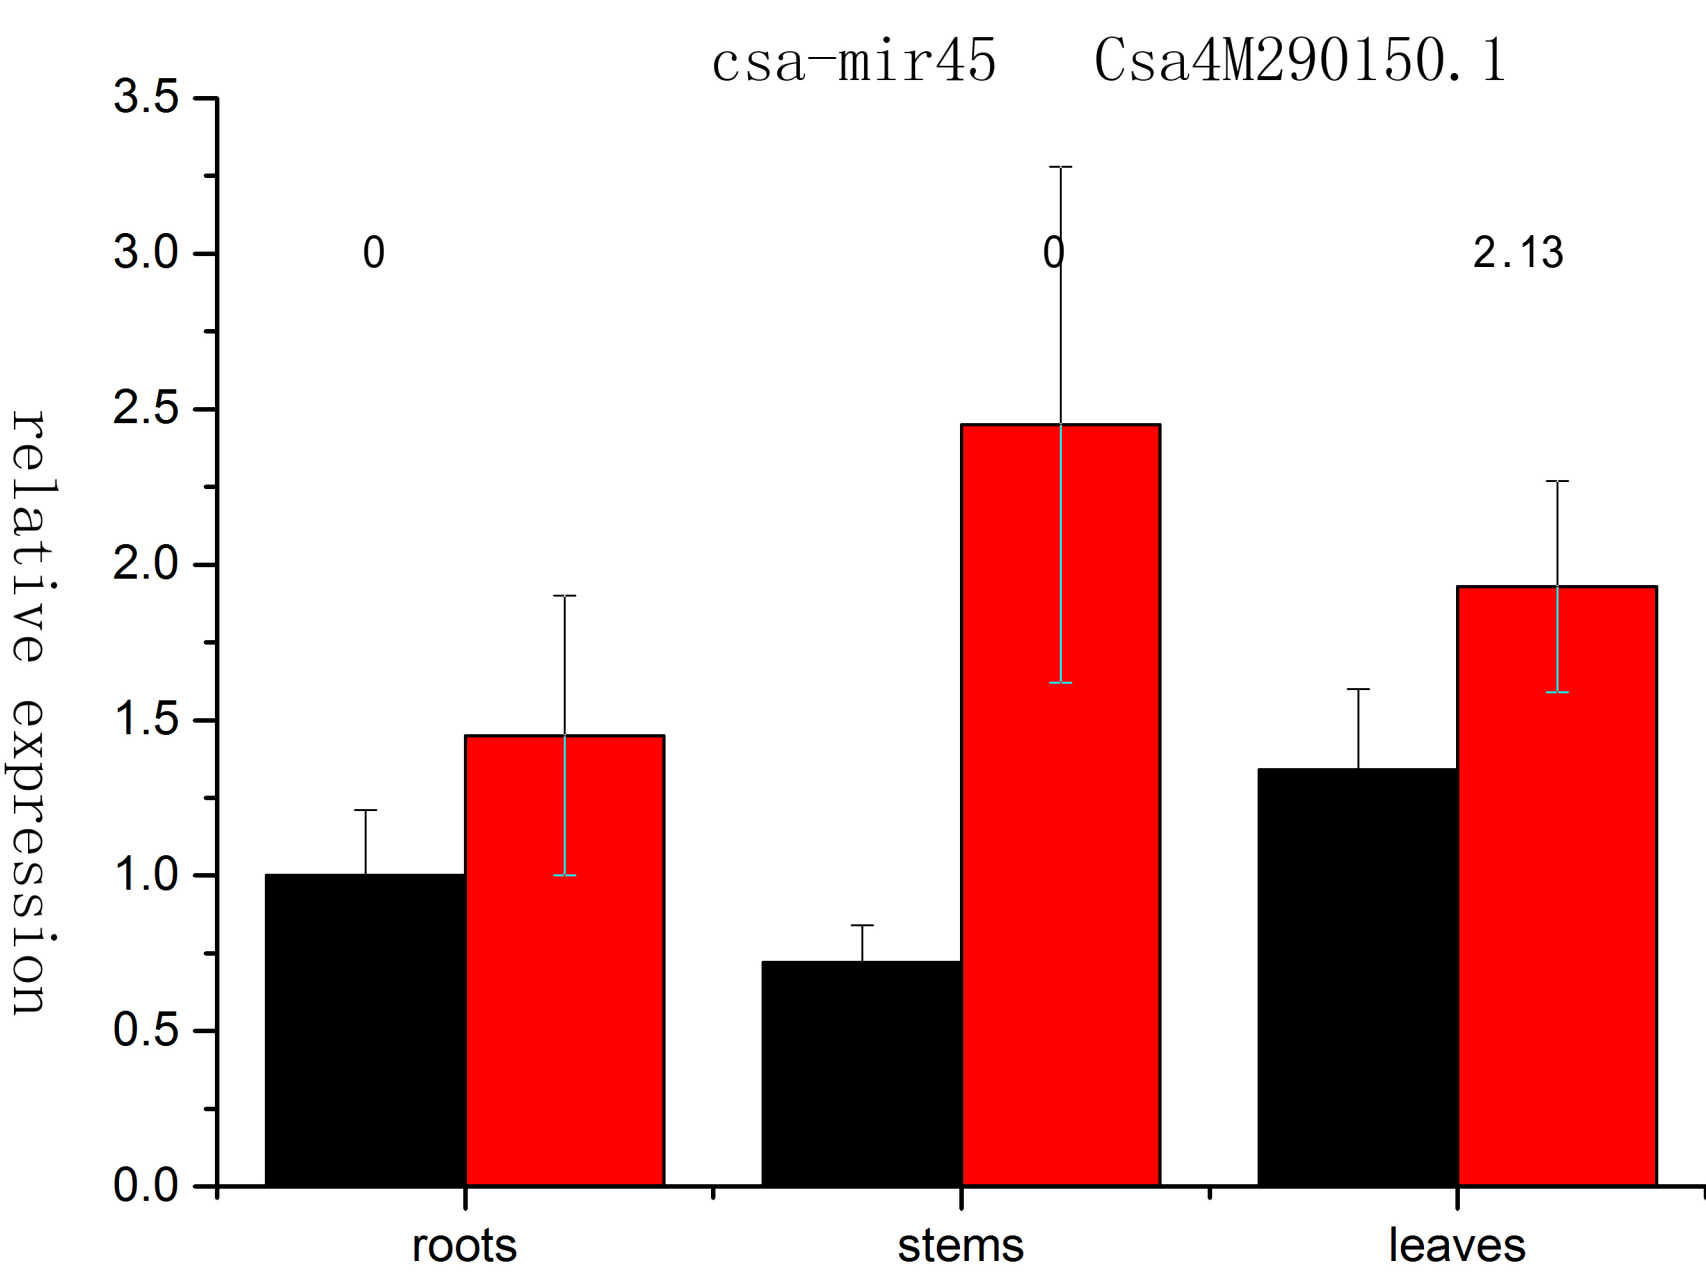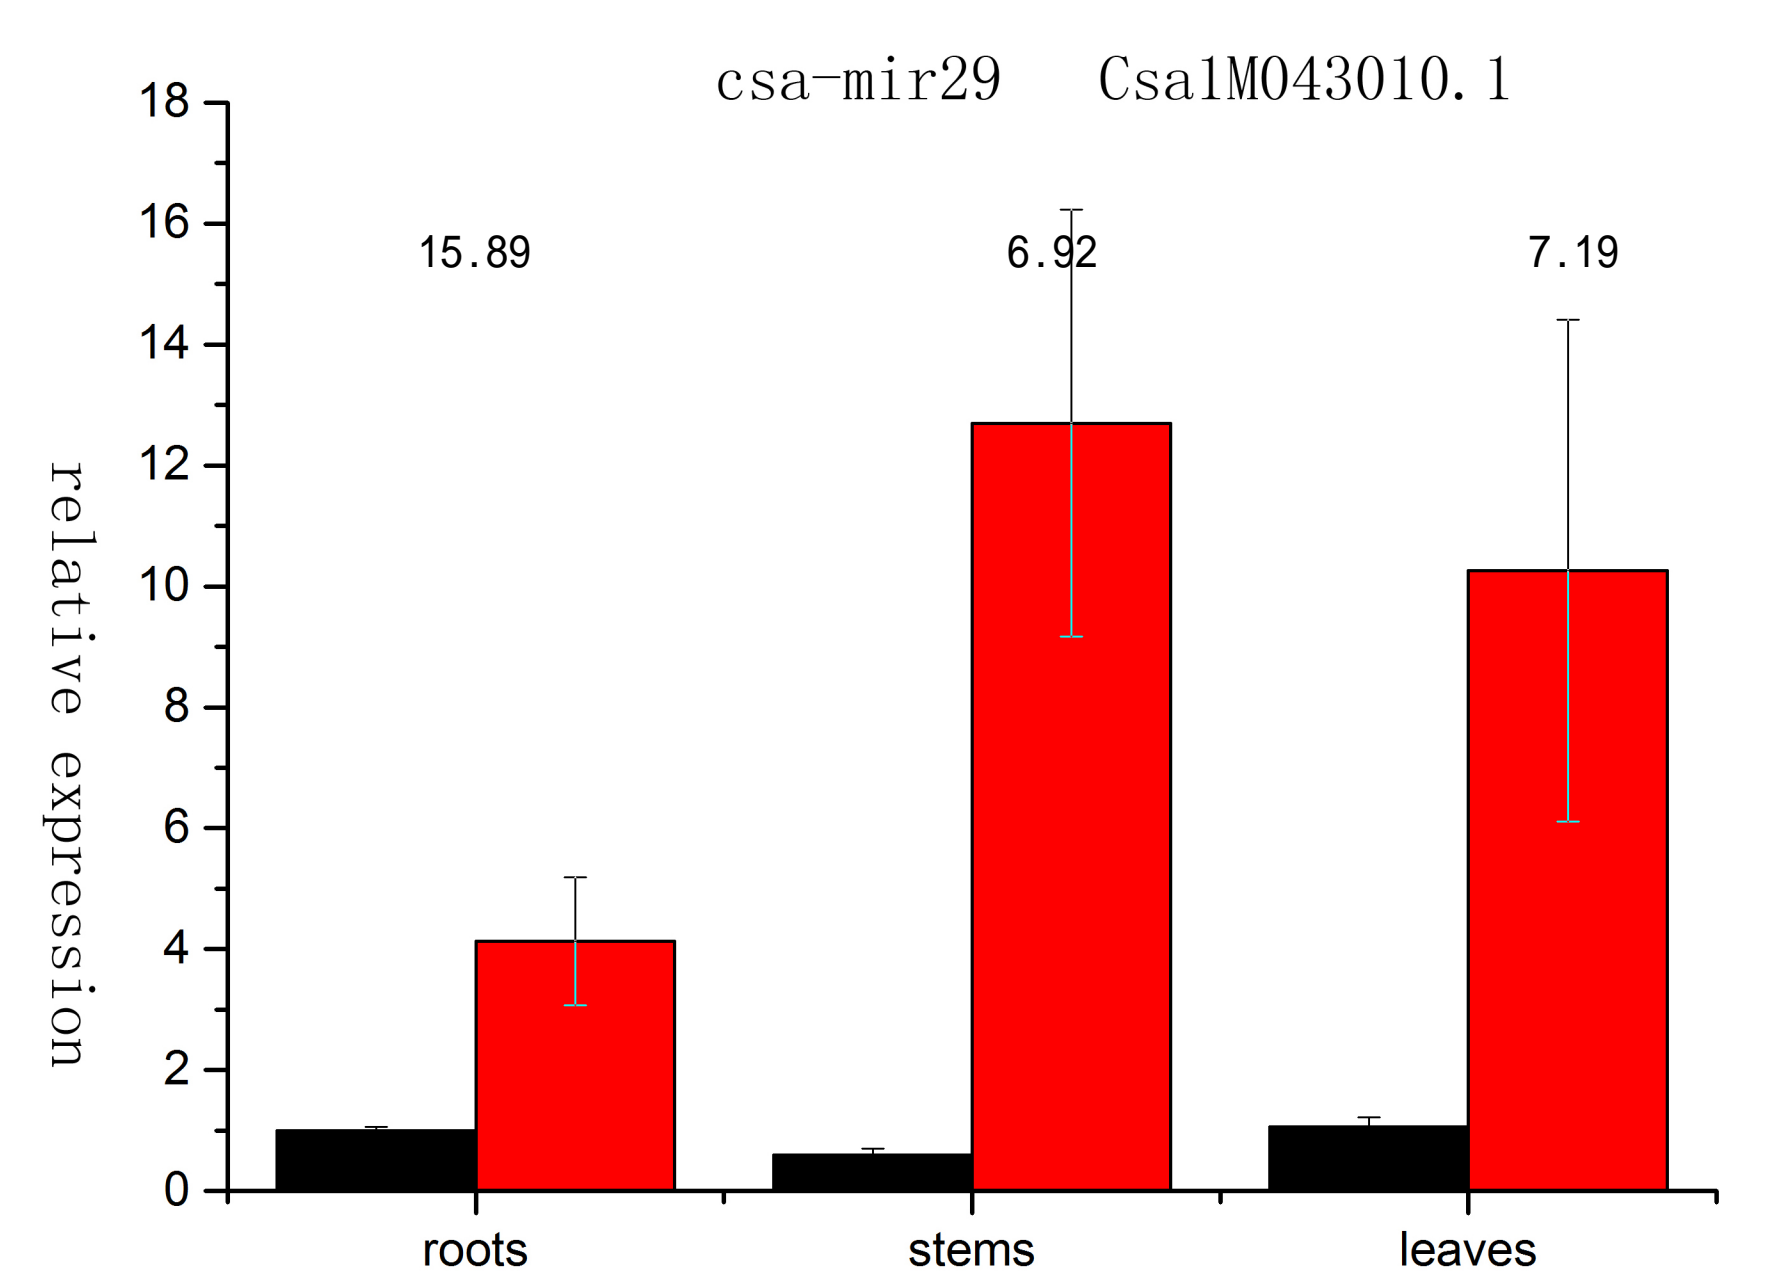

hardwickii-specific targets for conserved and known miRNA

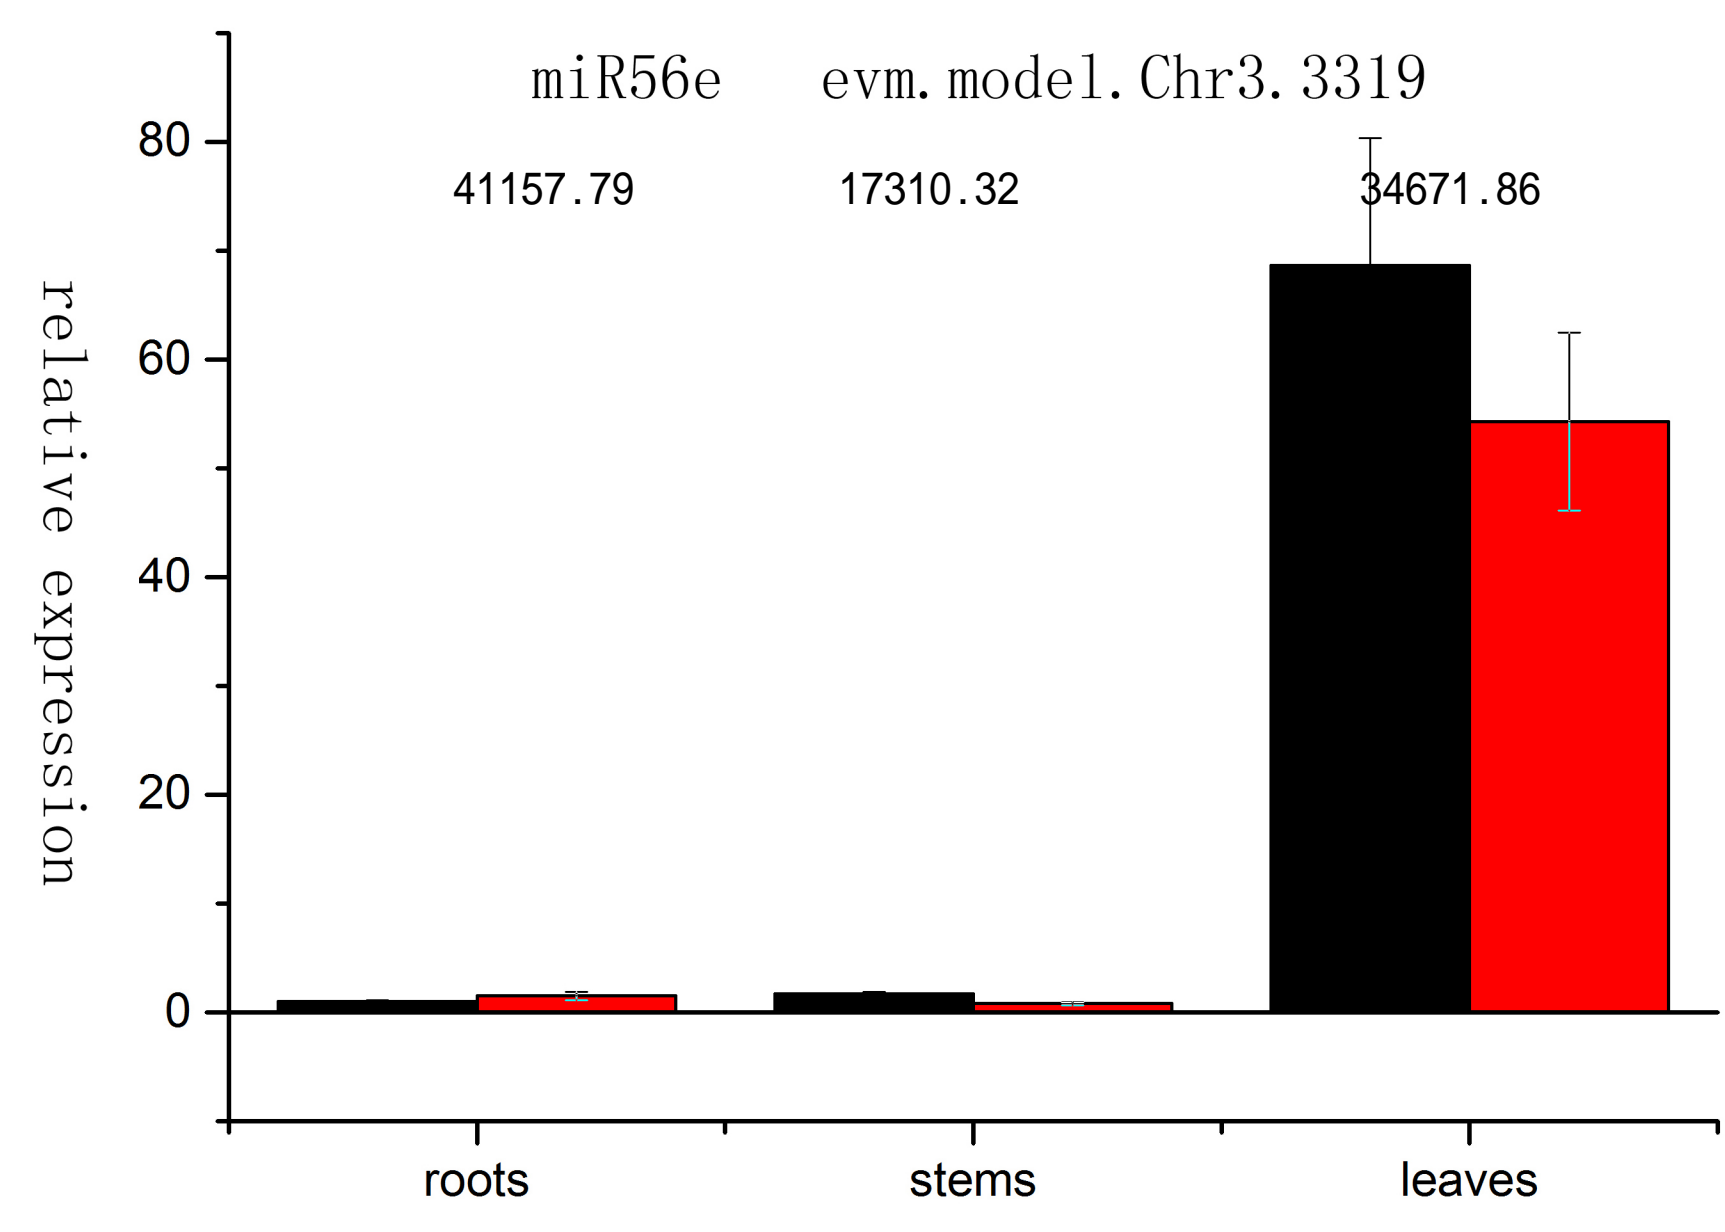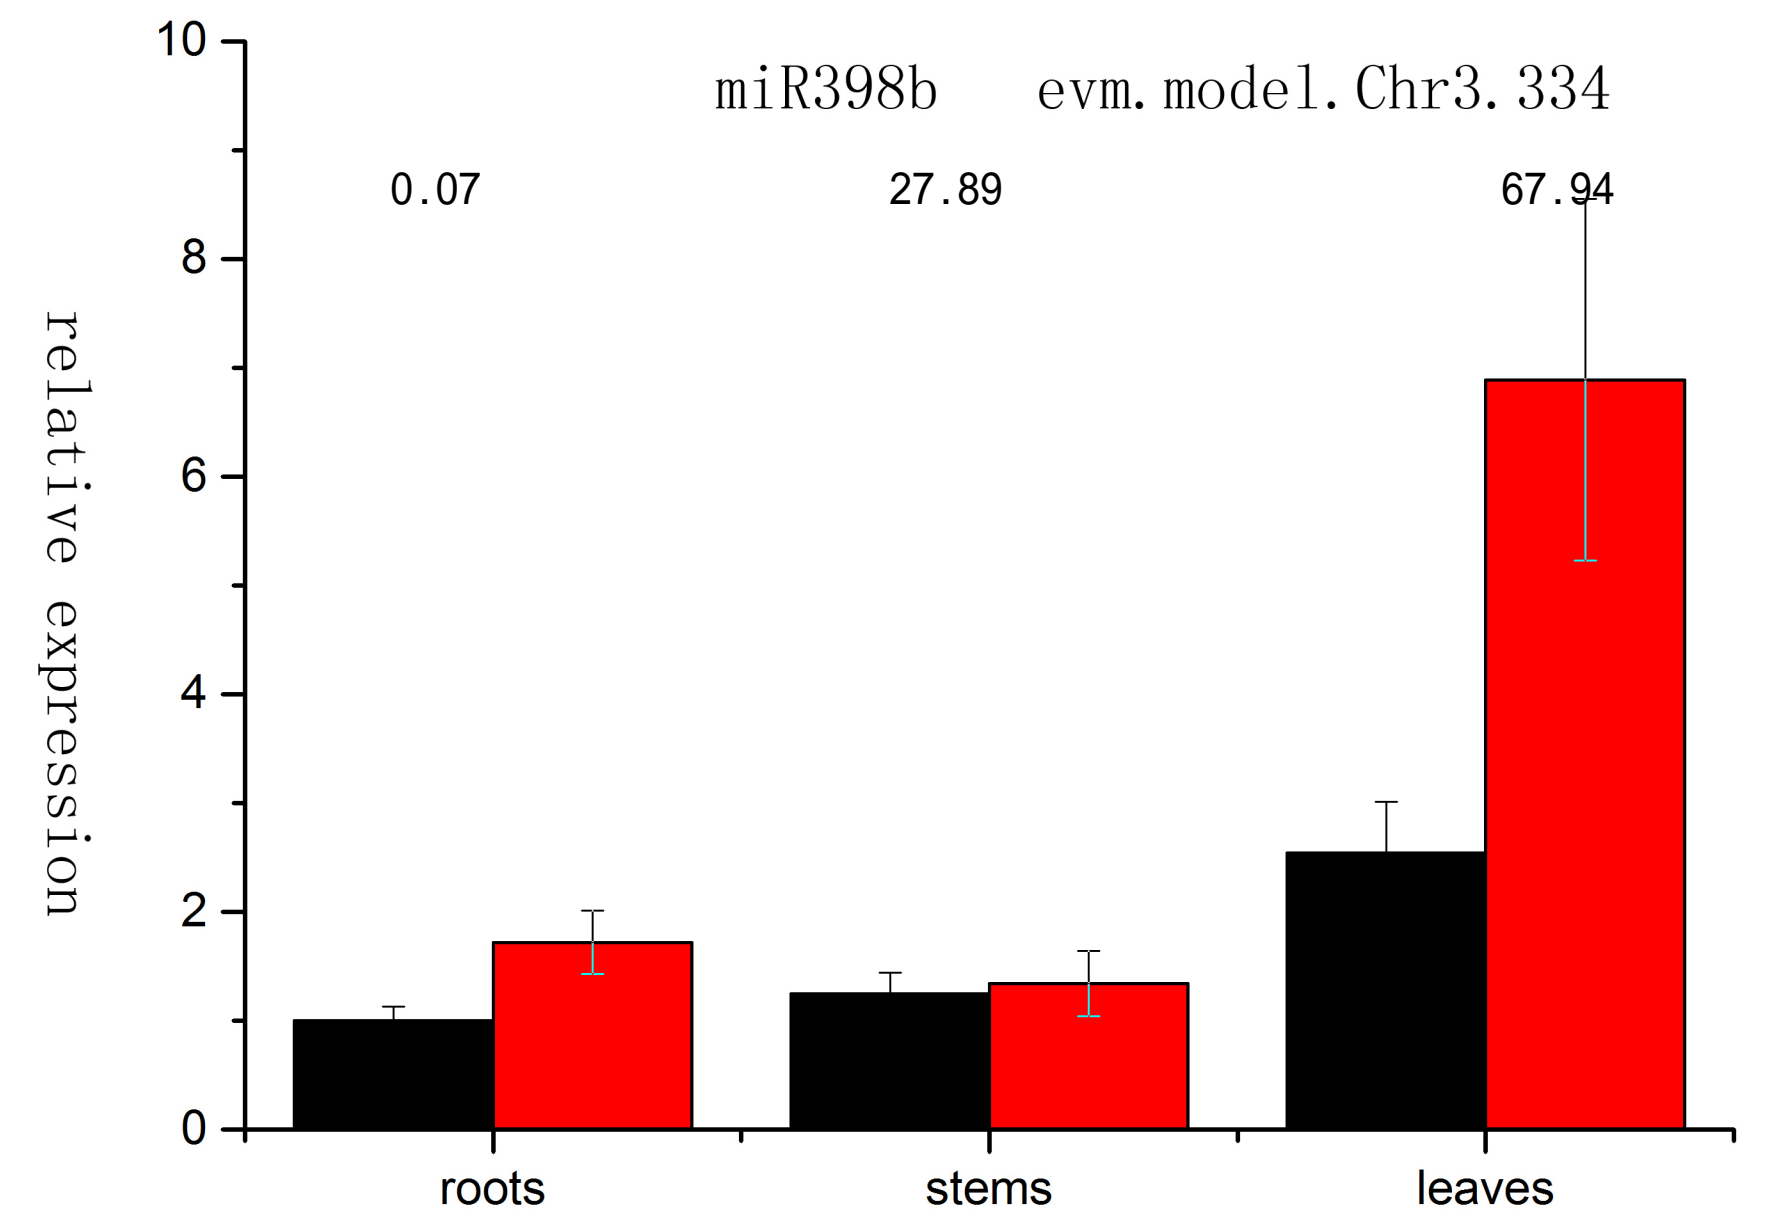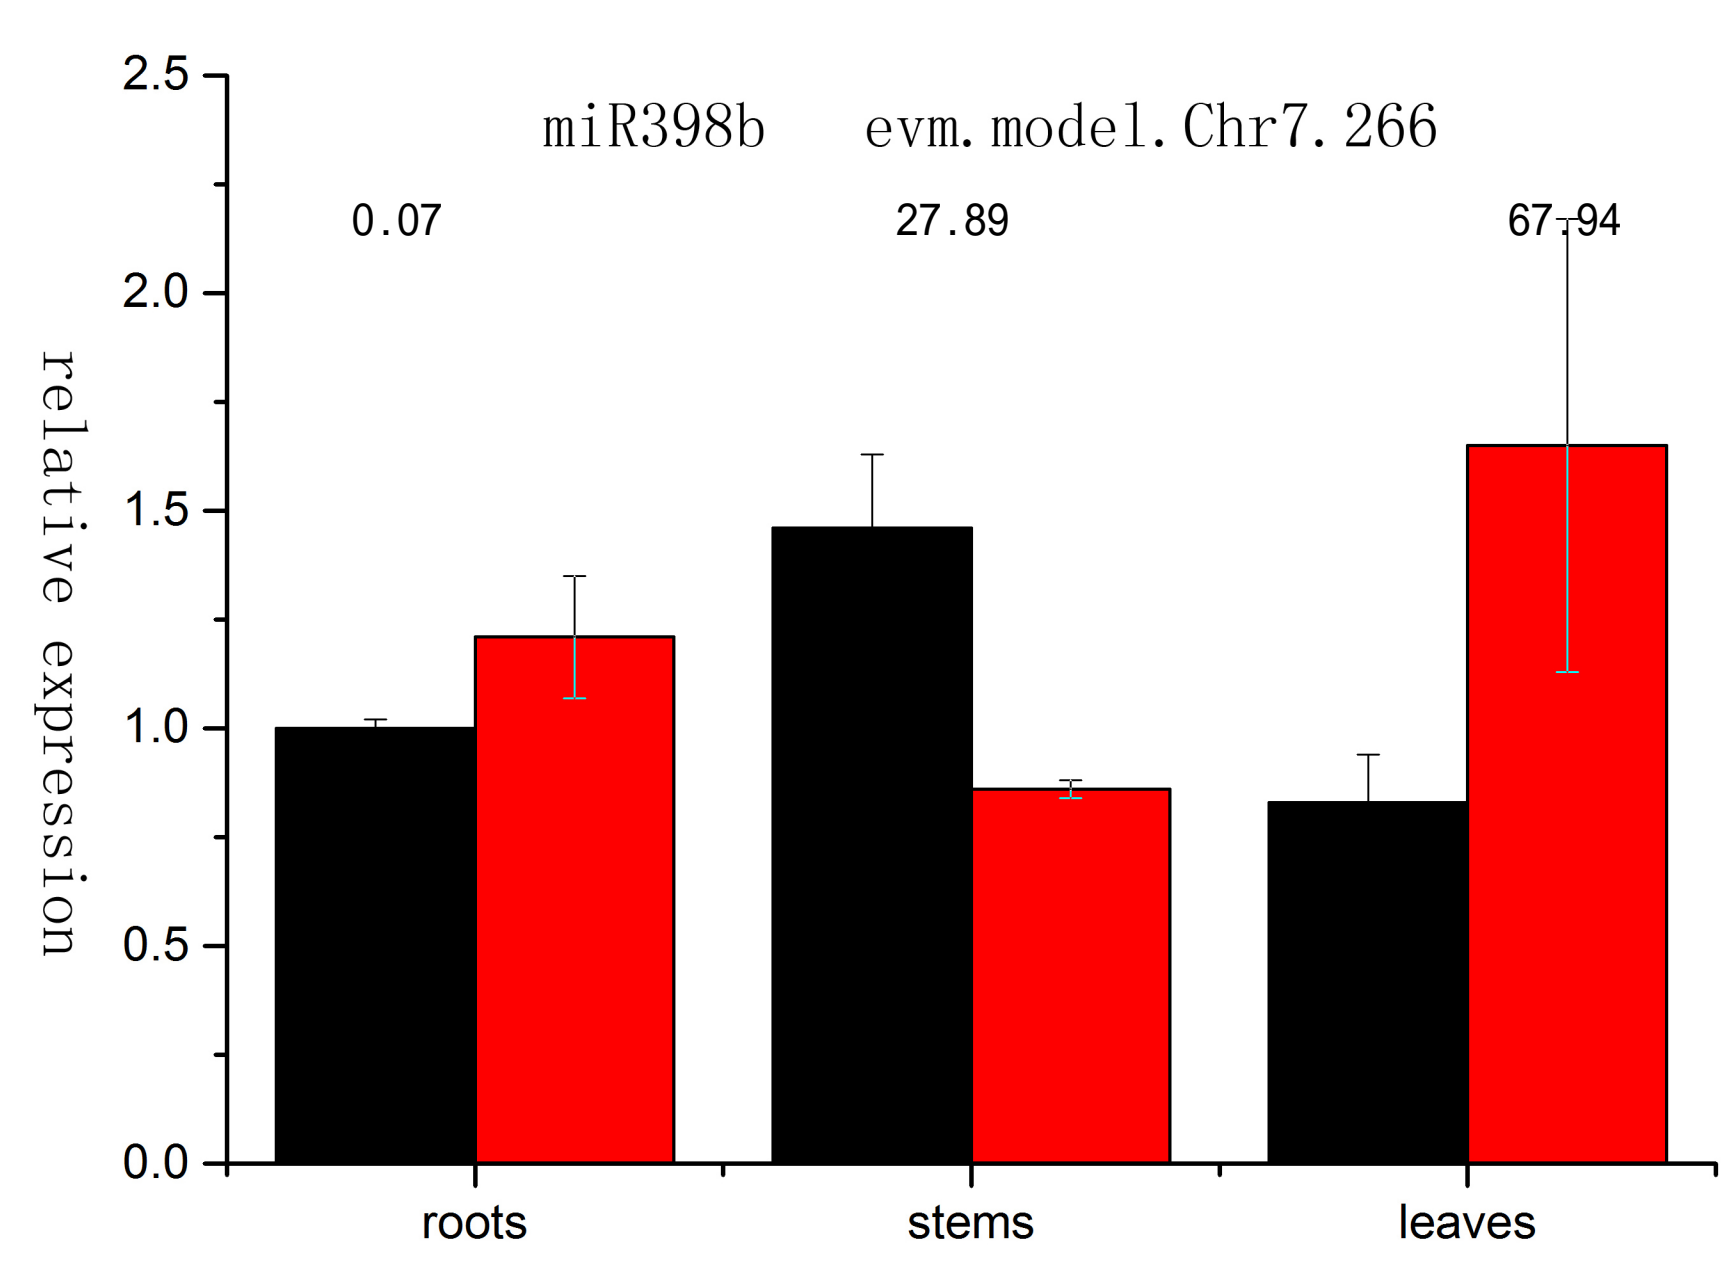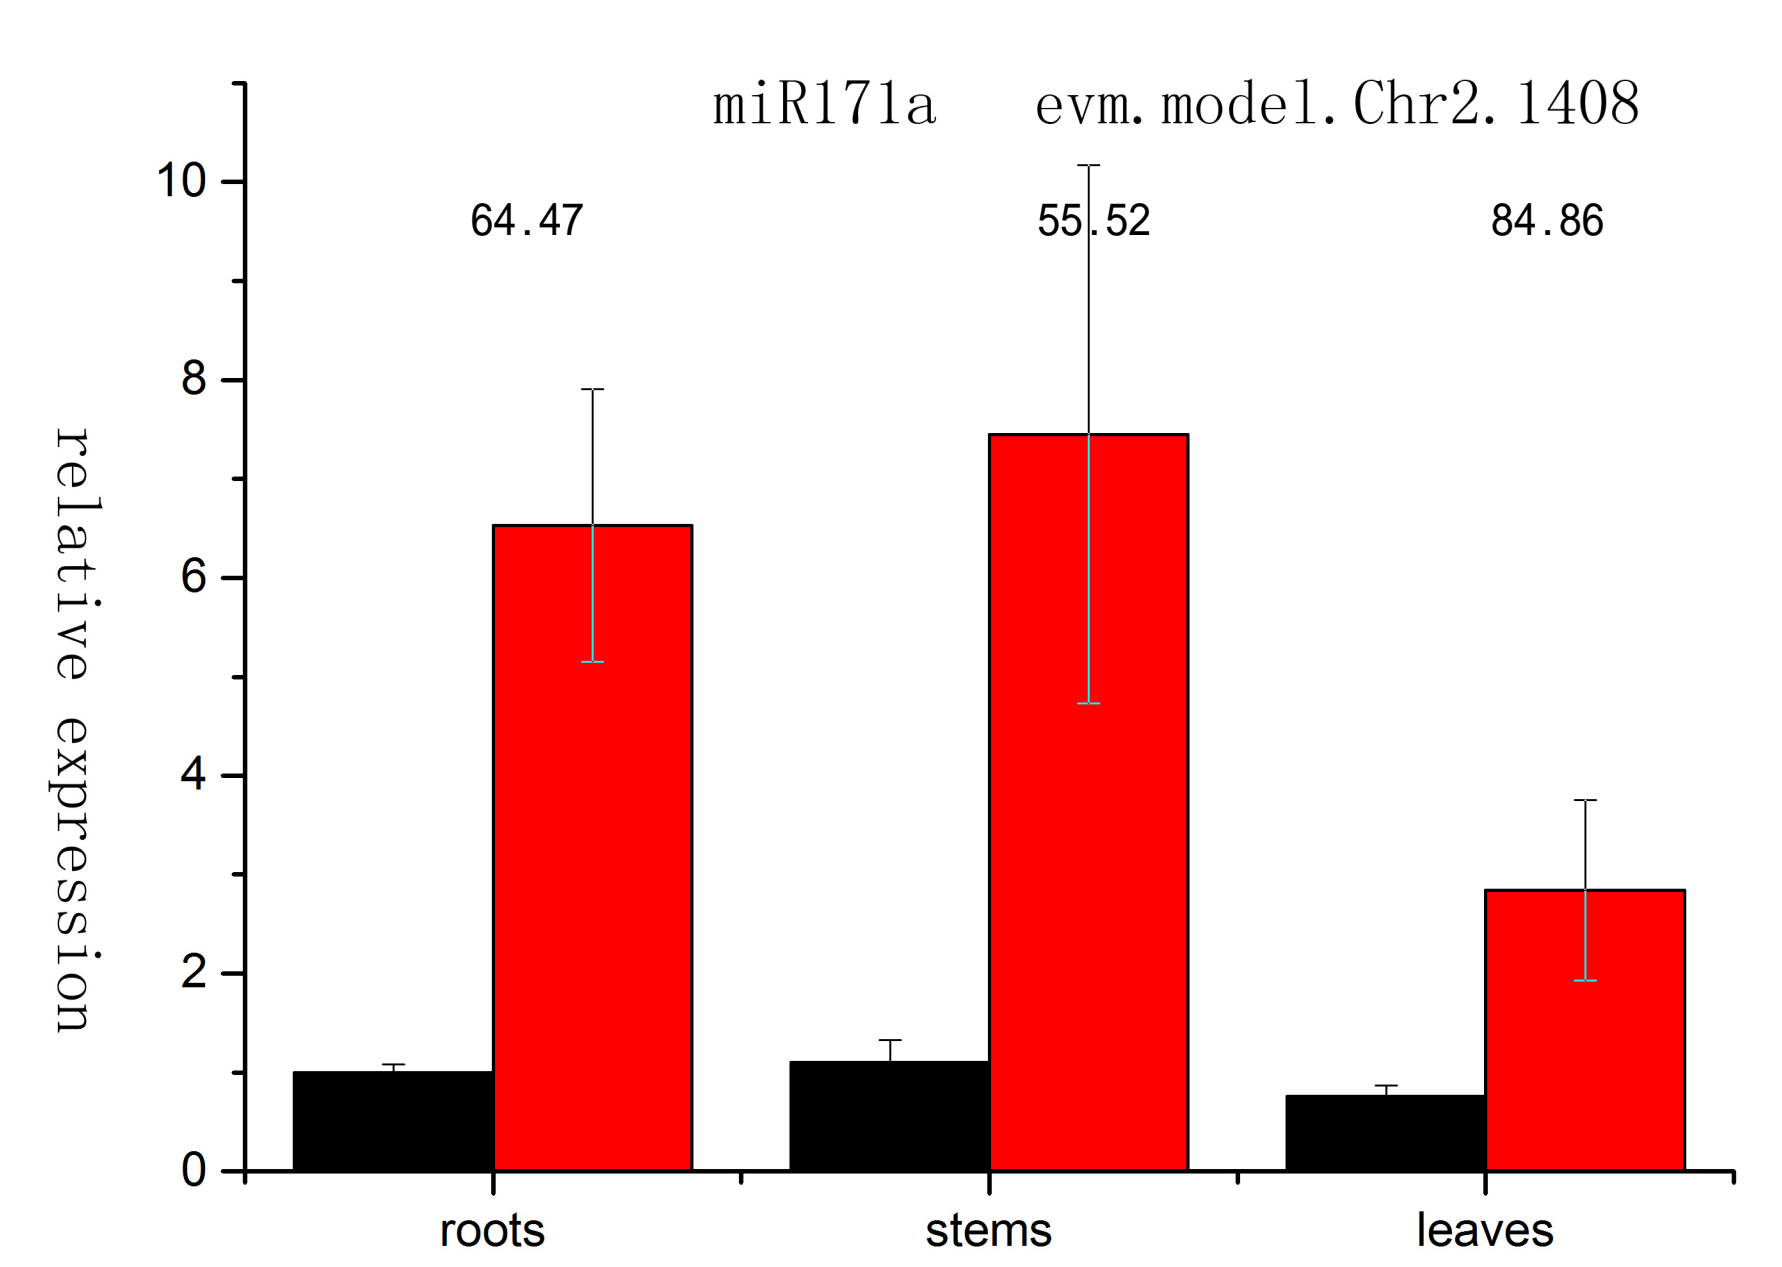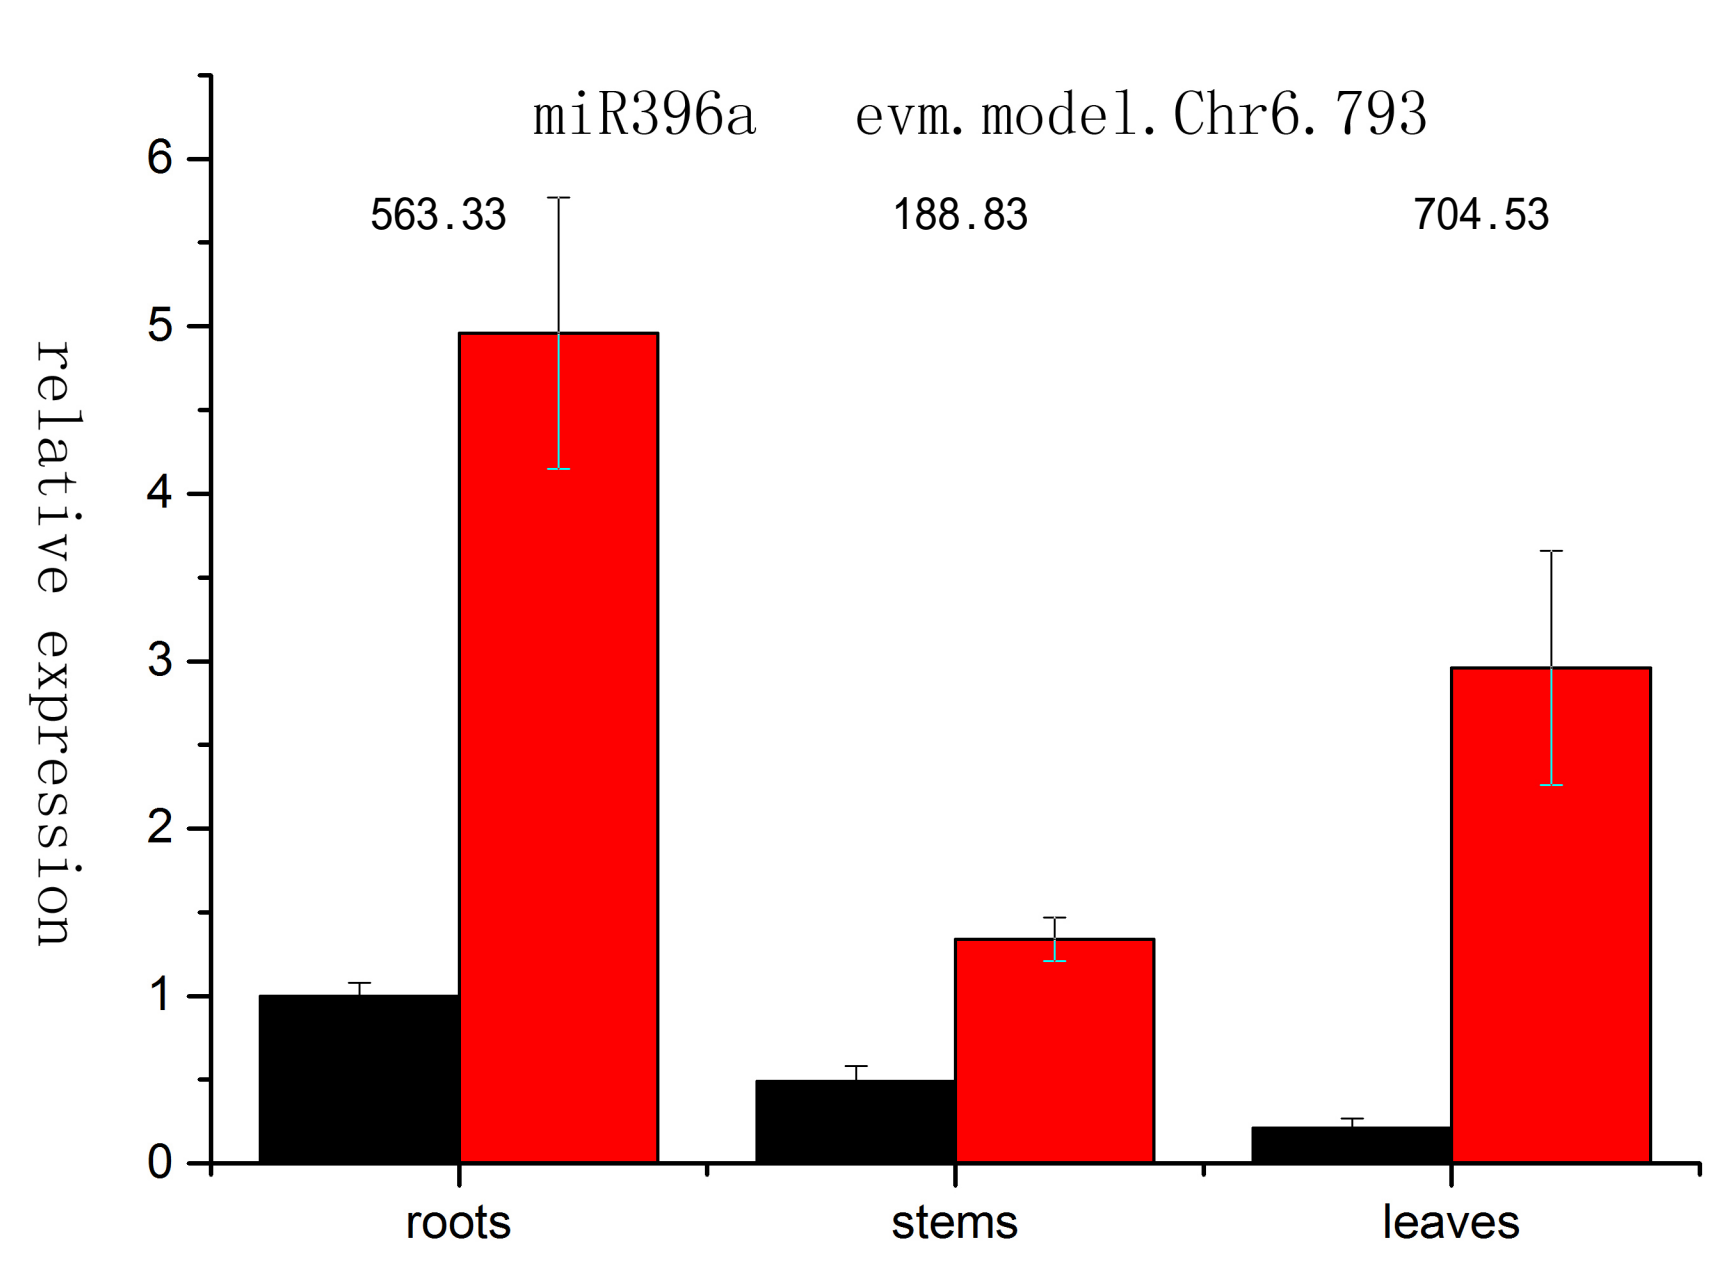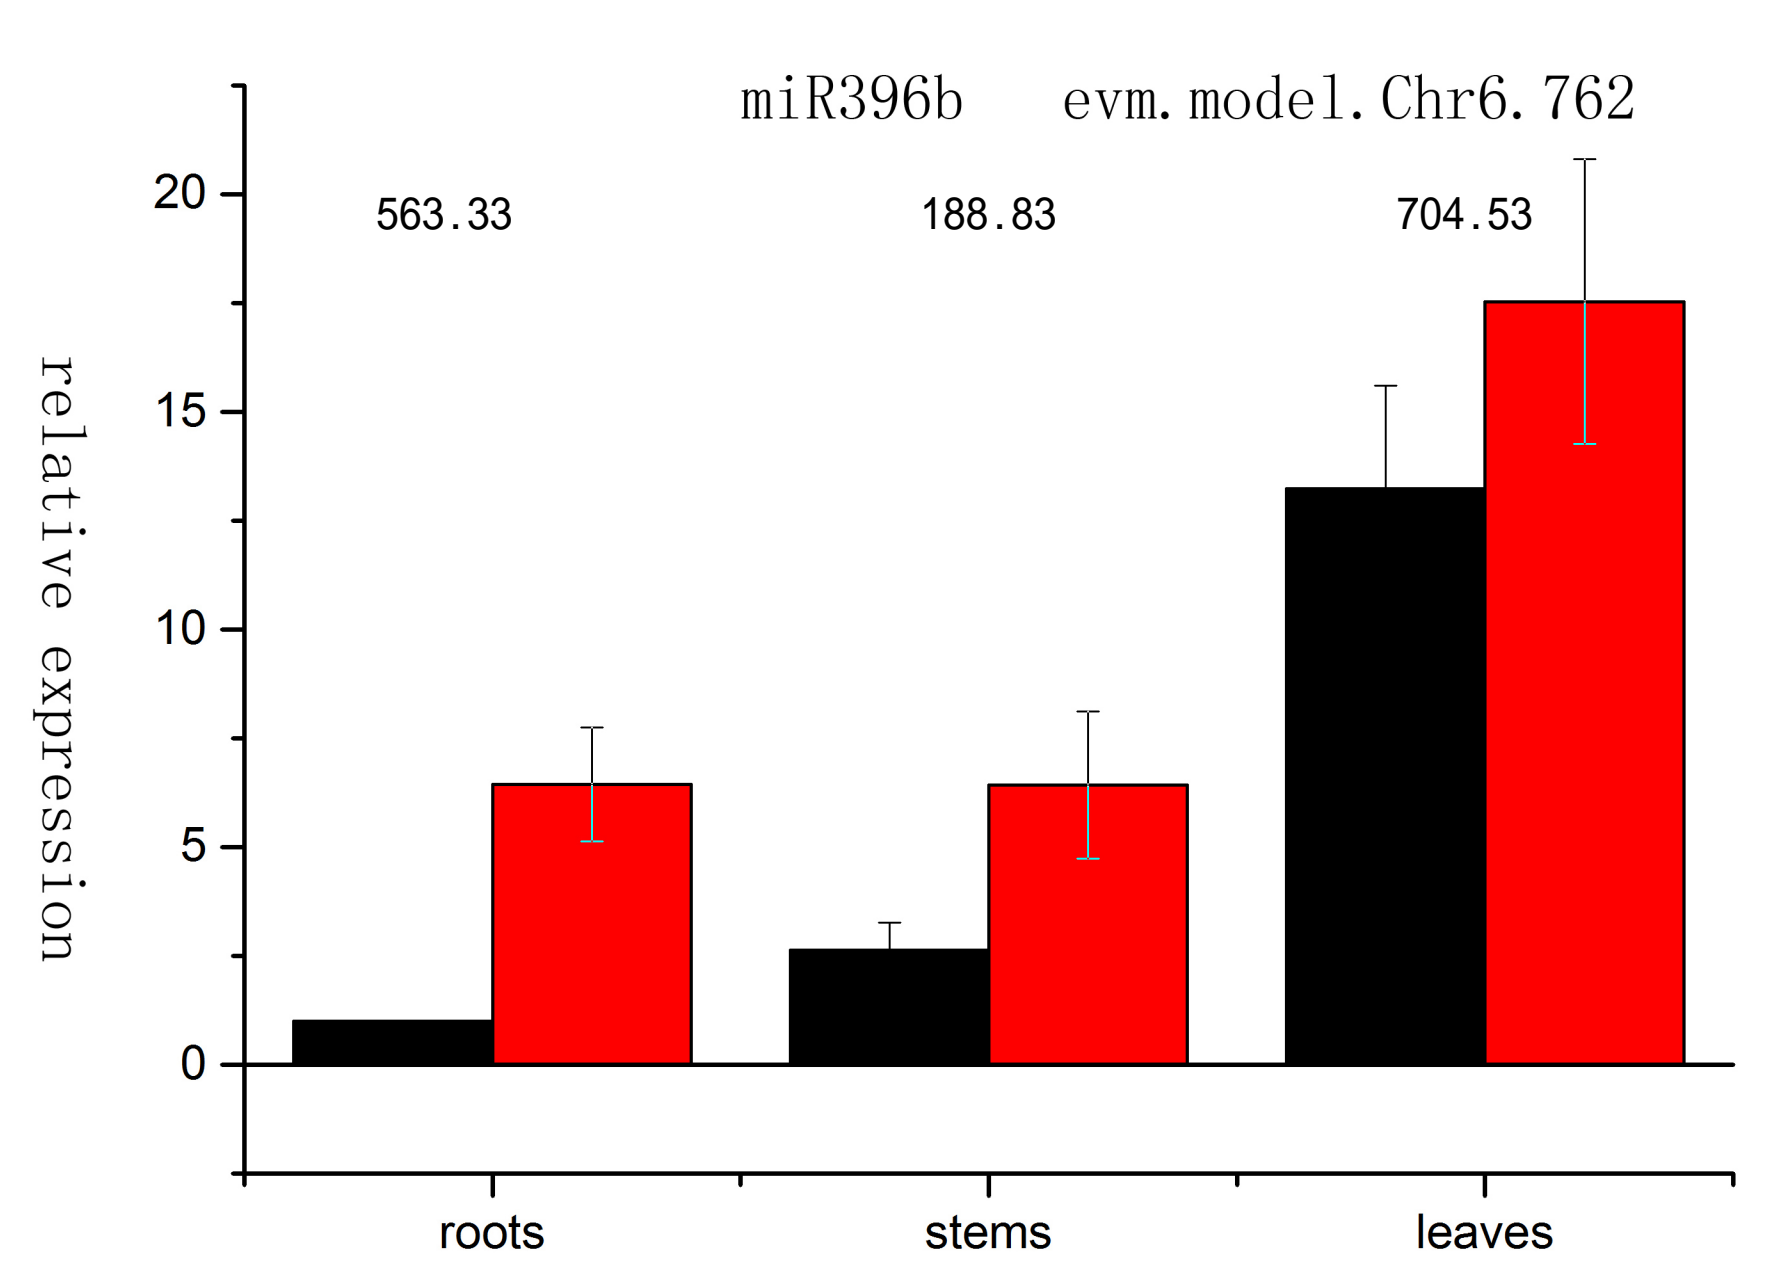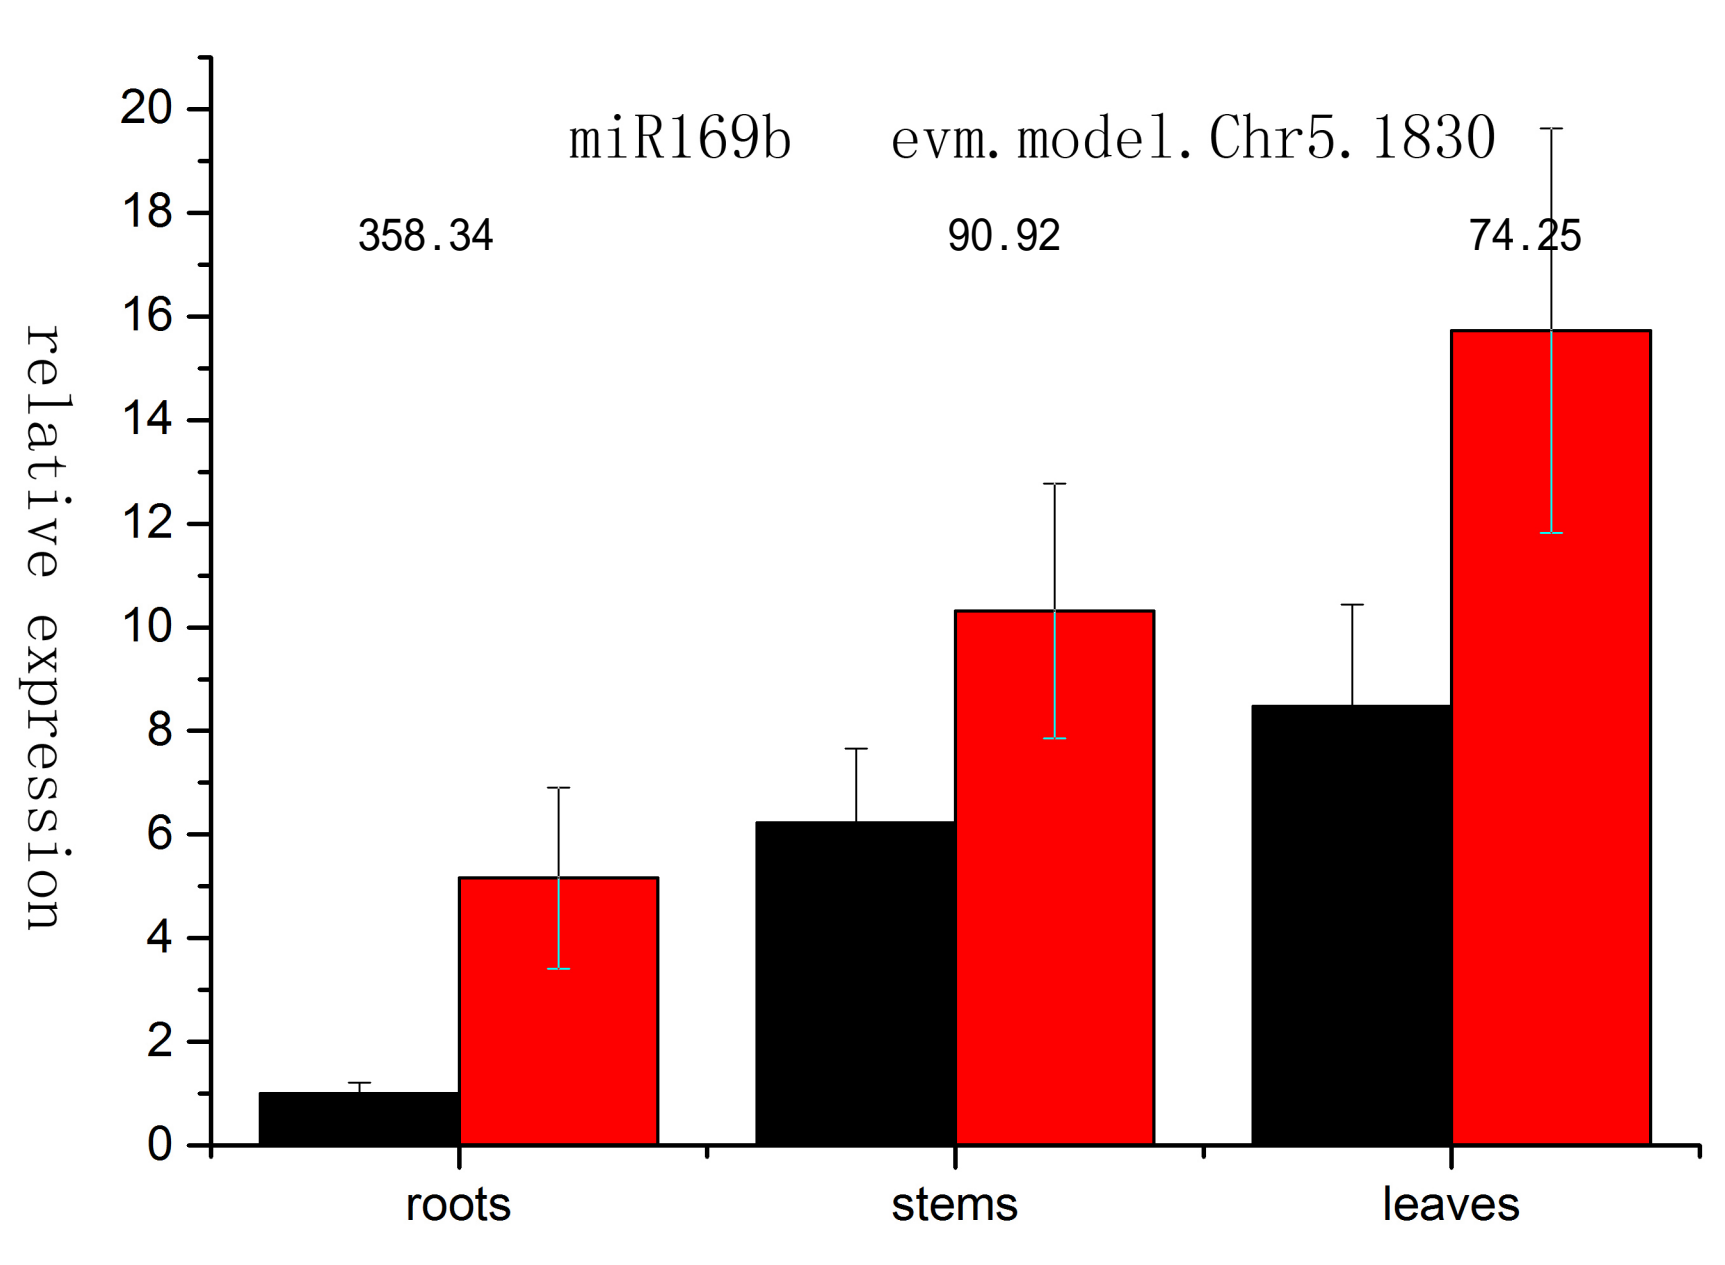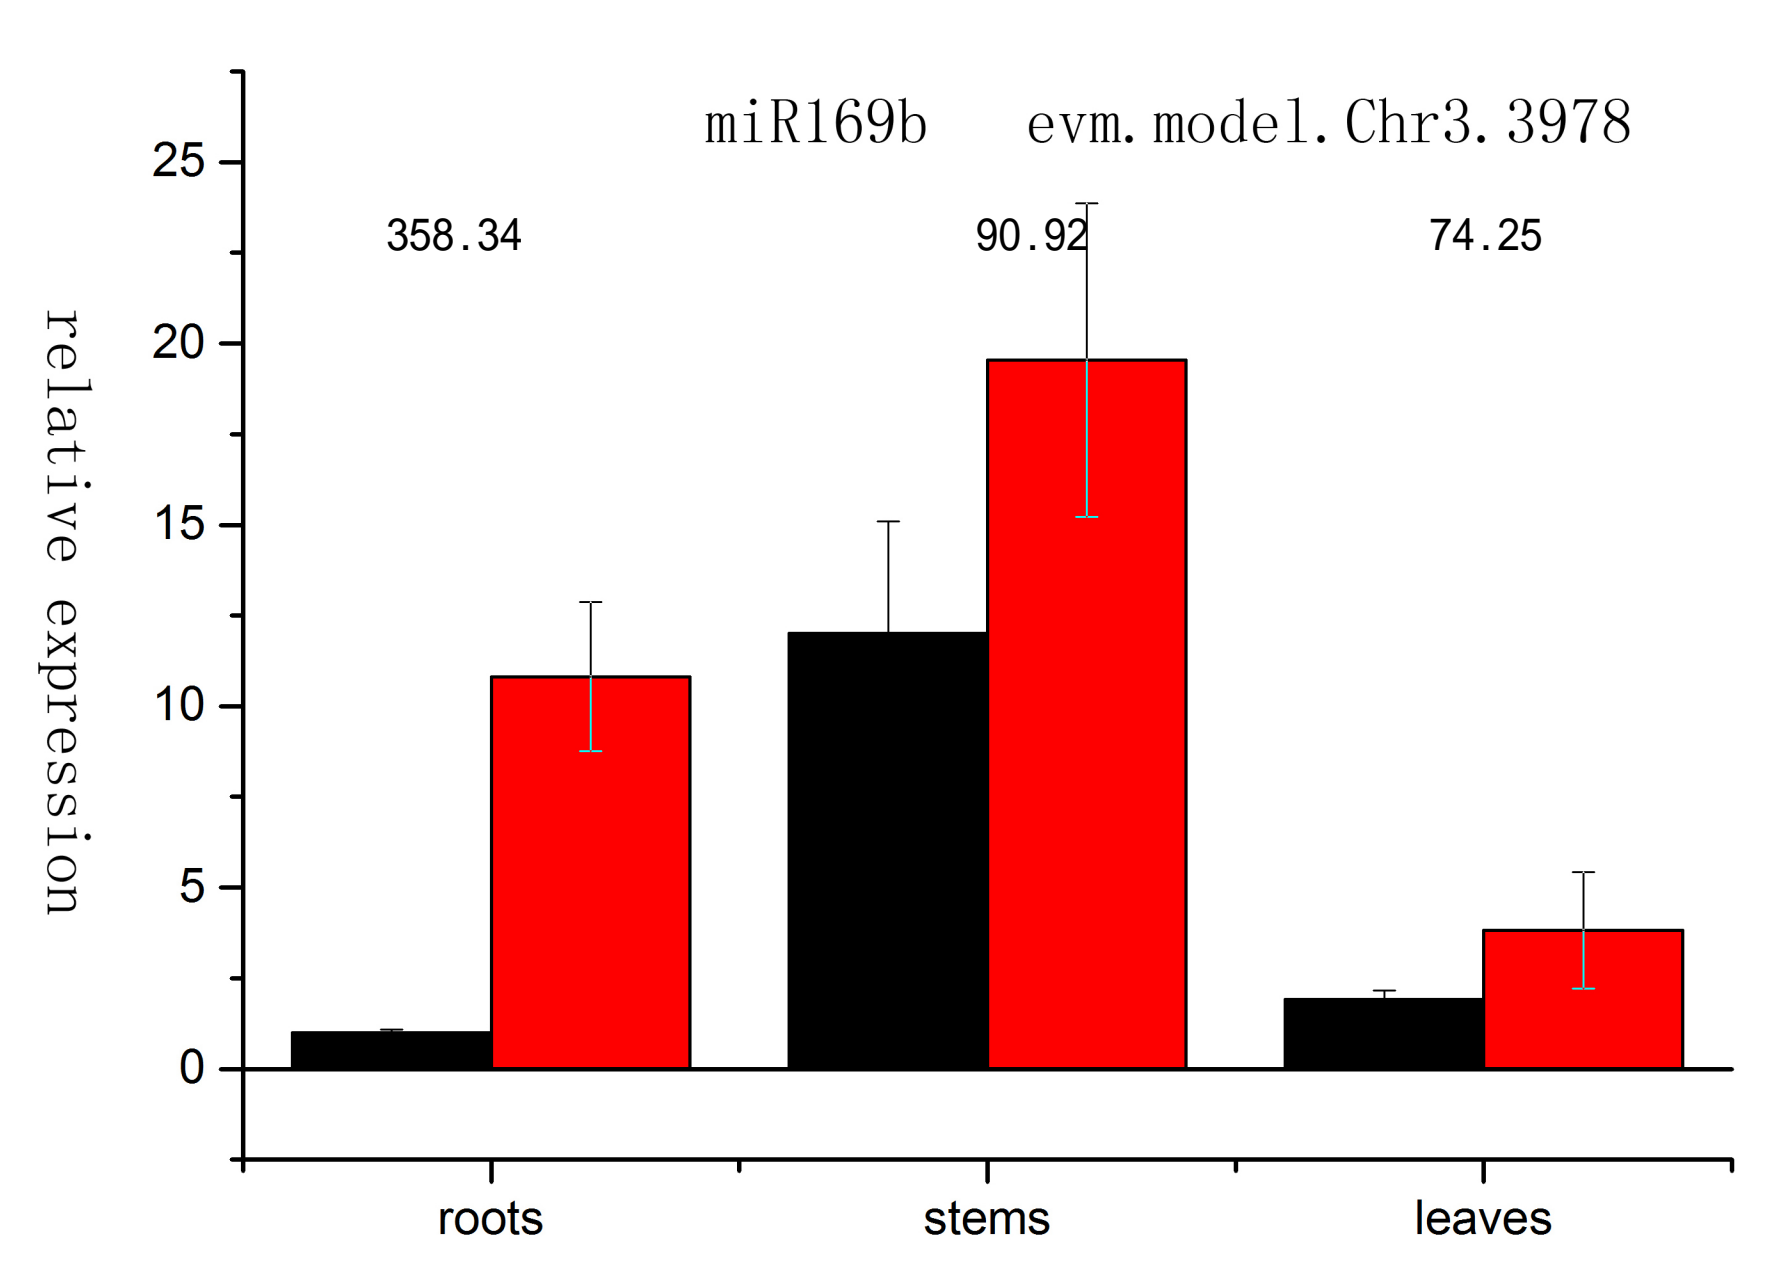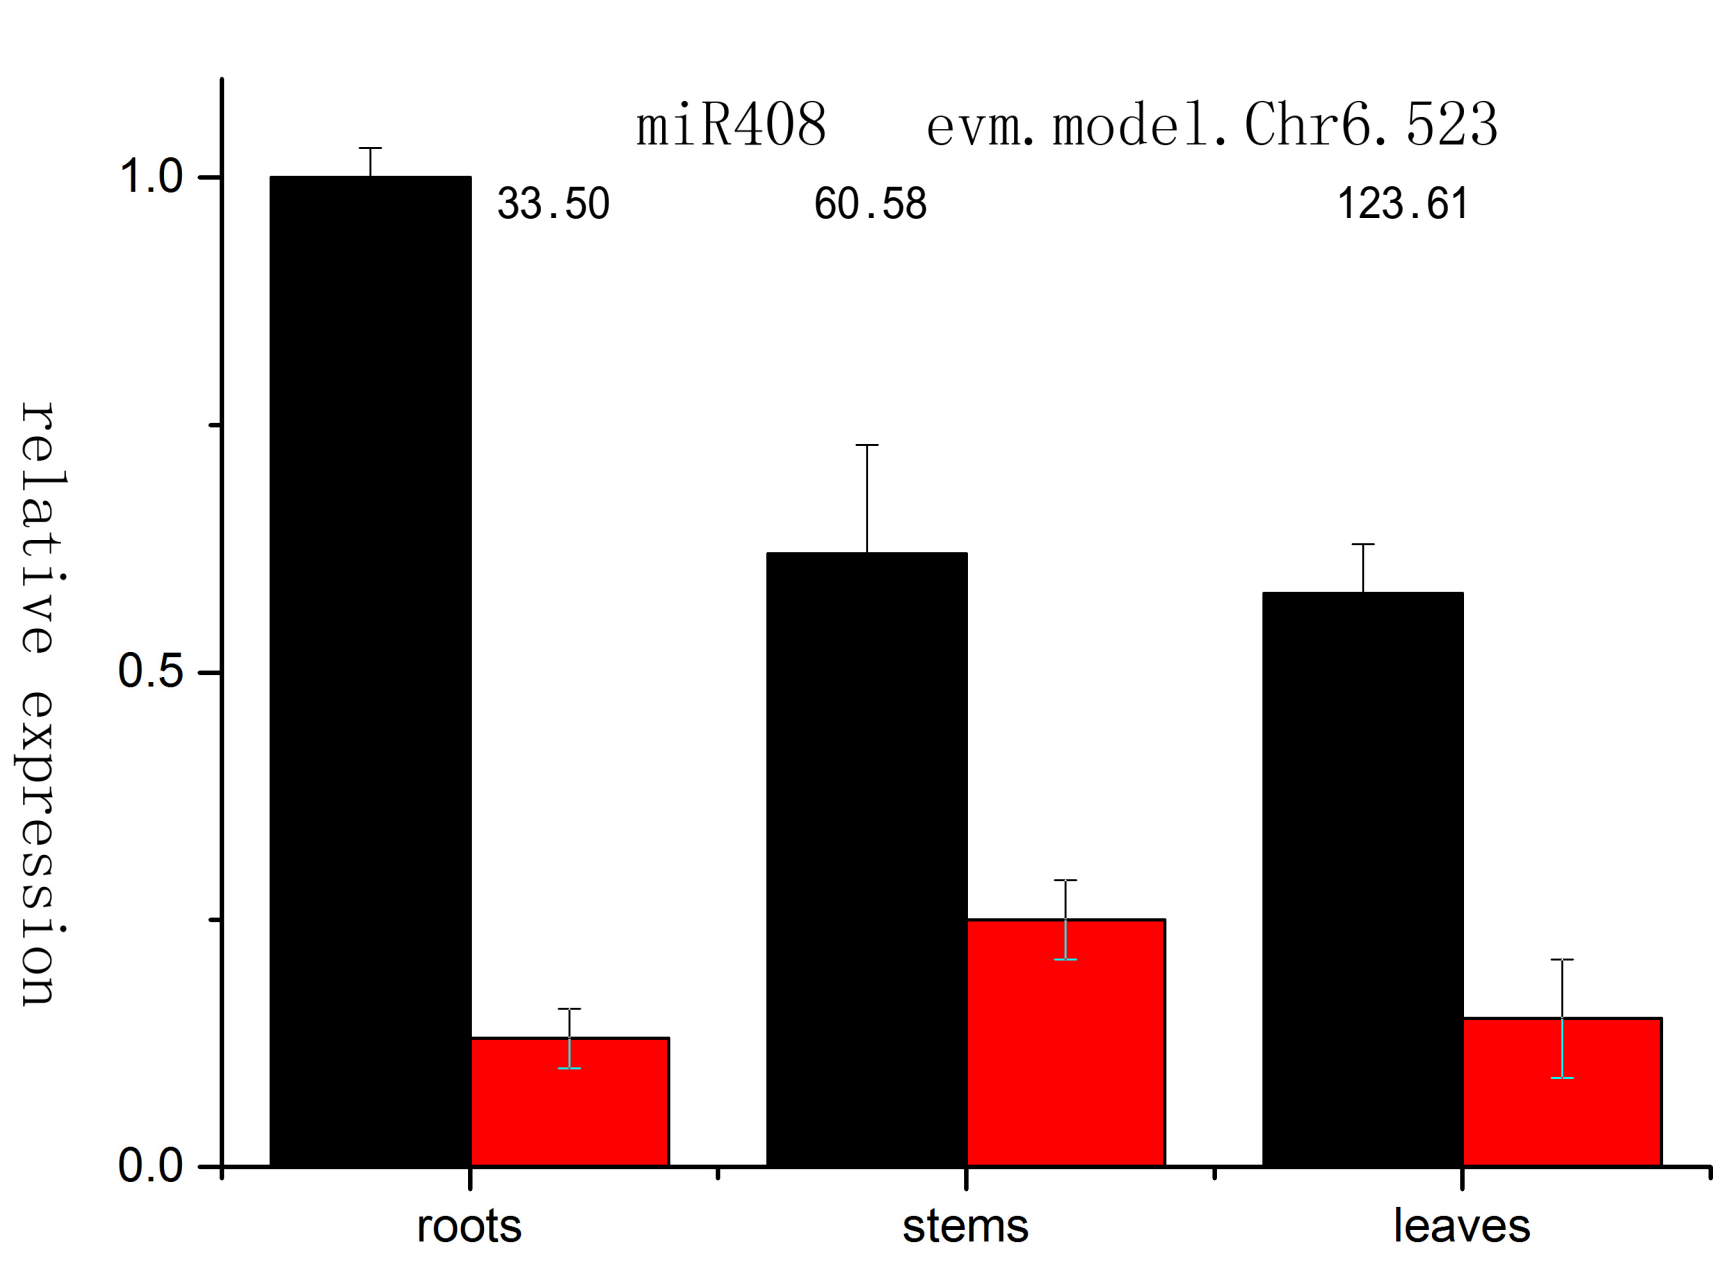

hardwiki-specific targets for cucumber-specific miRNA

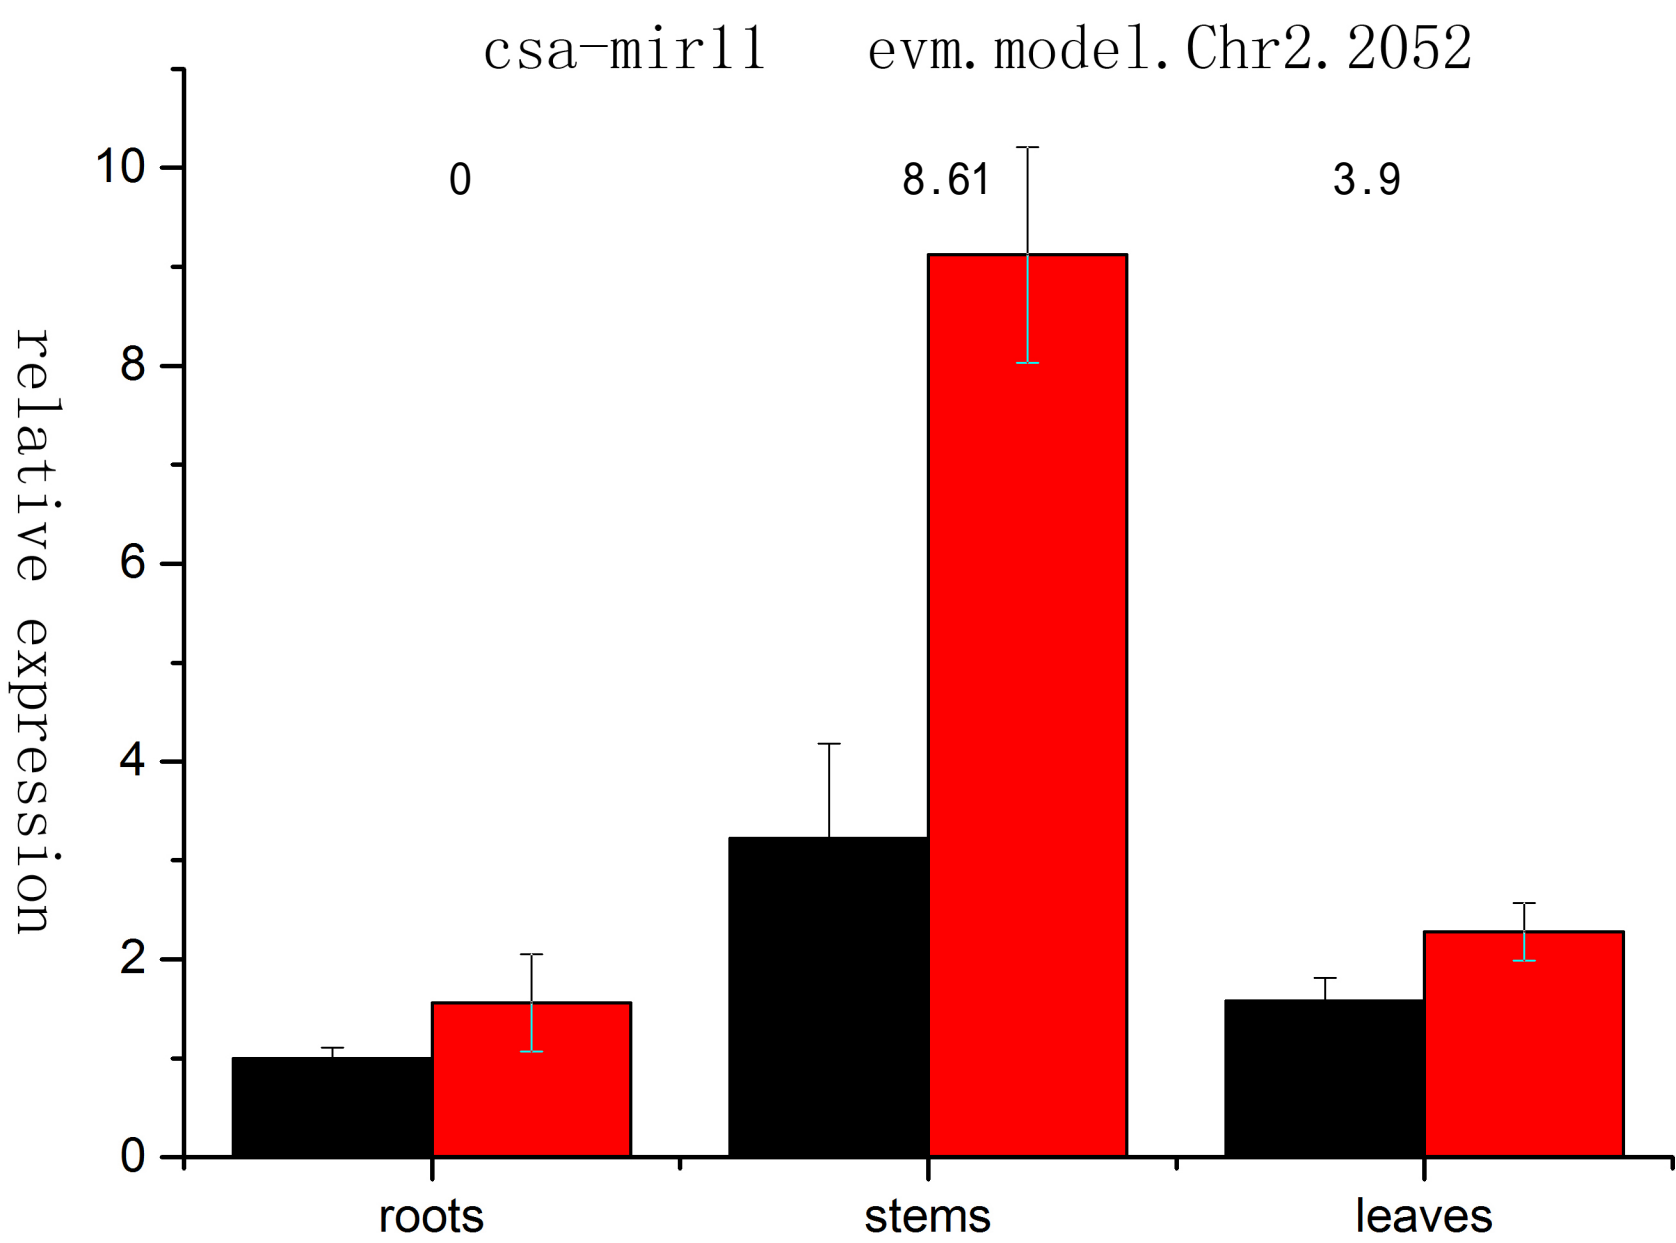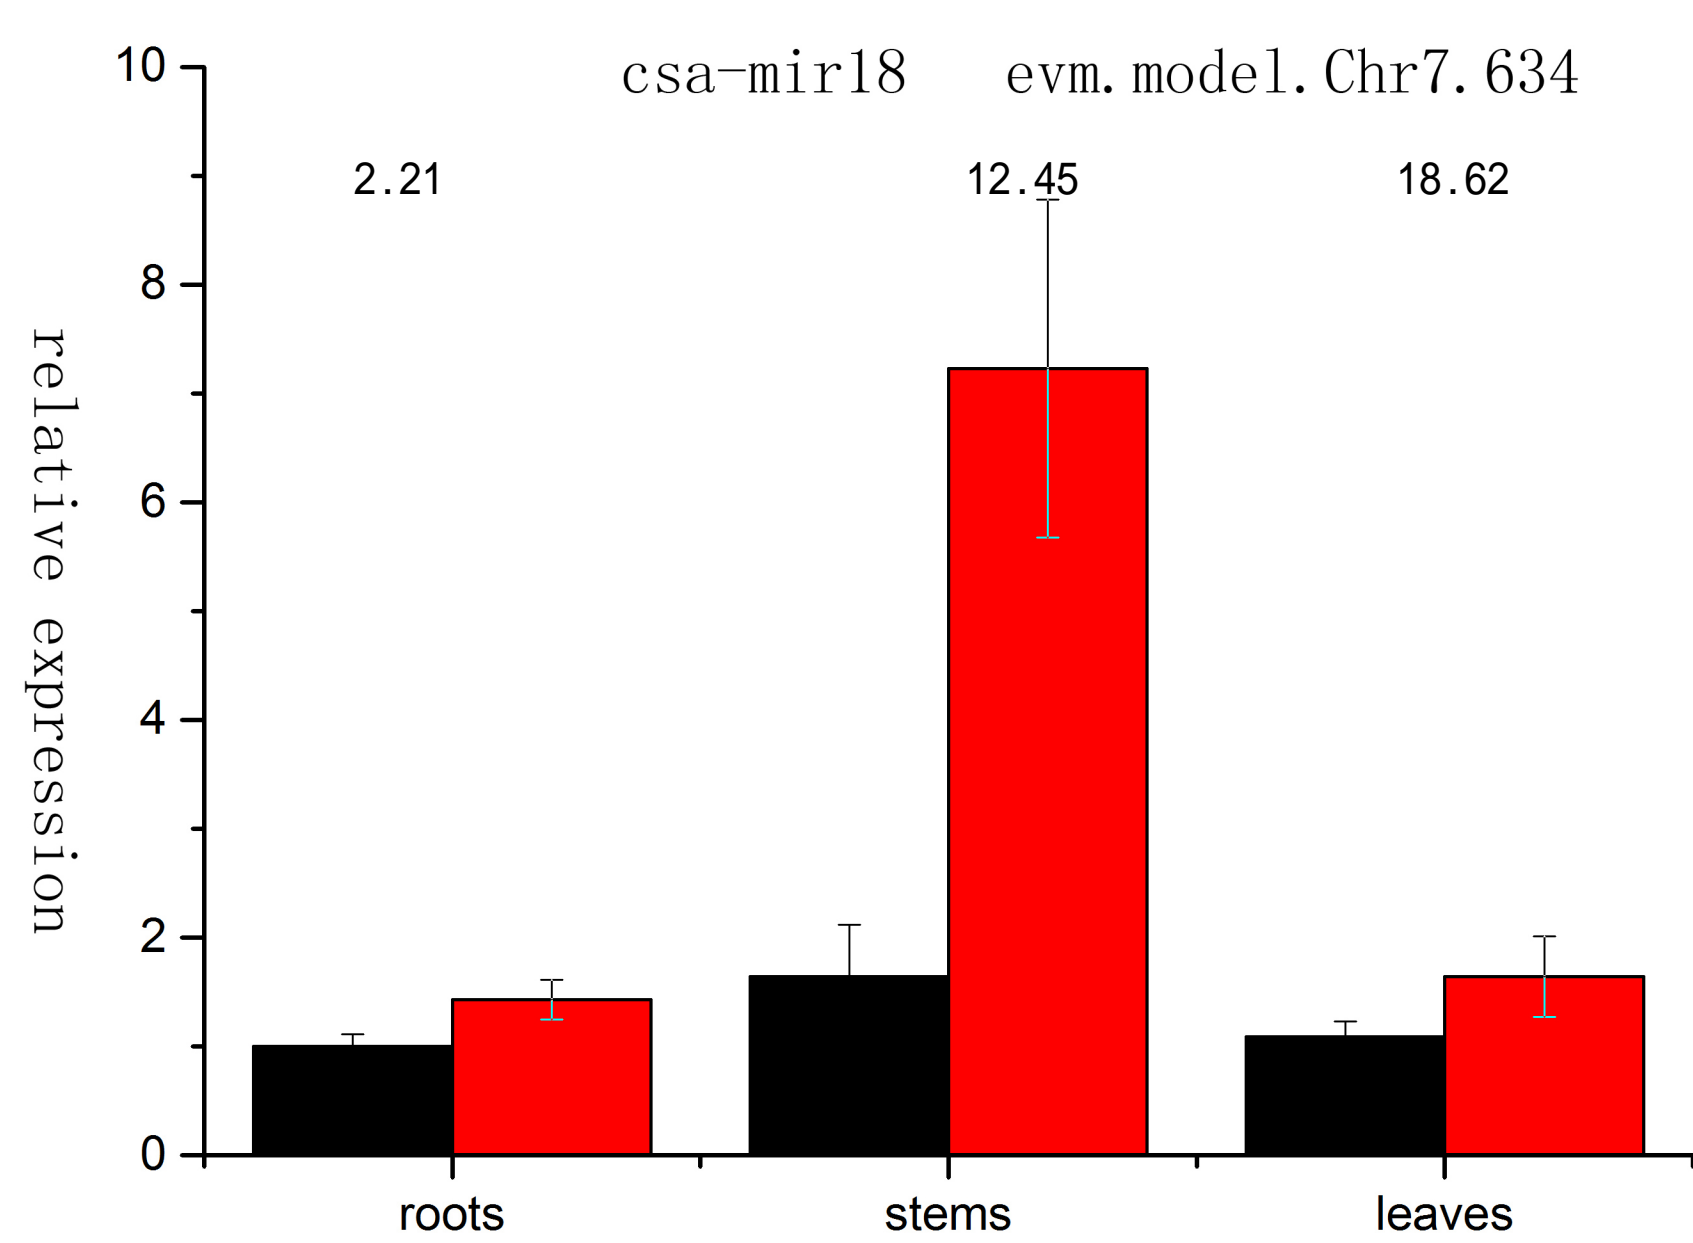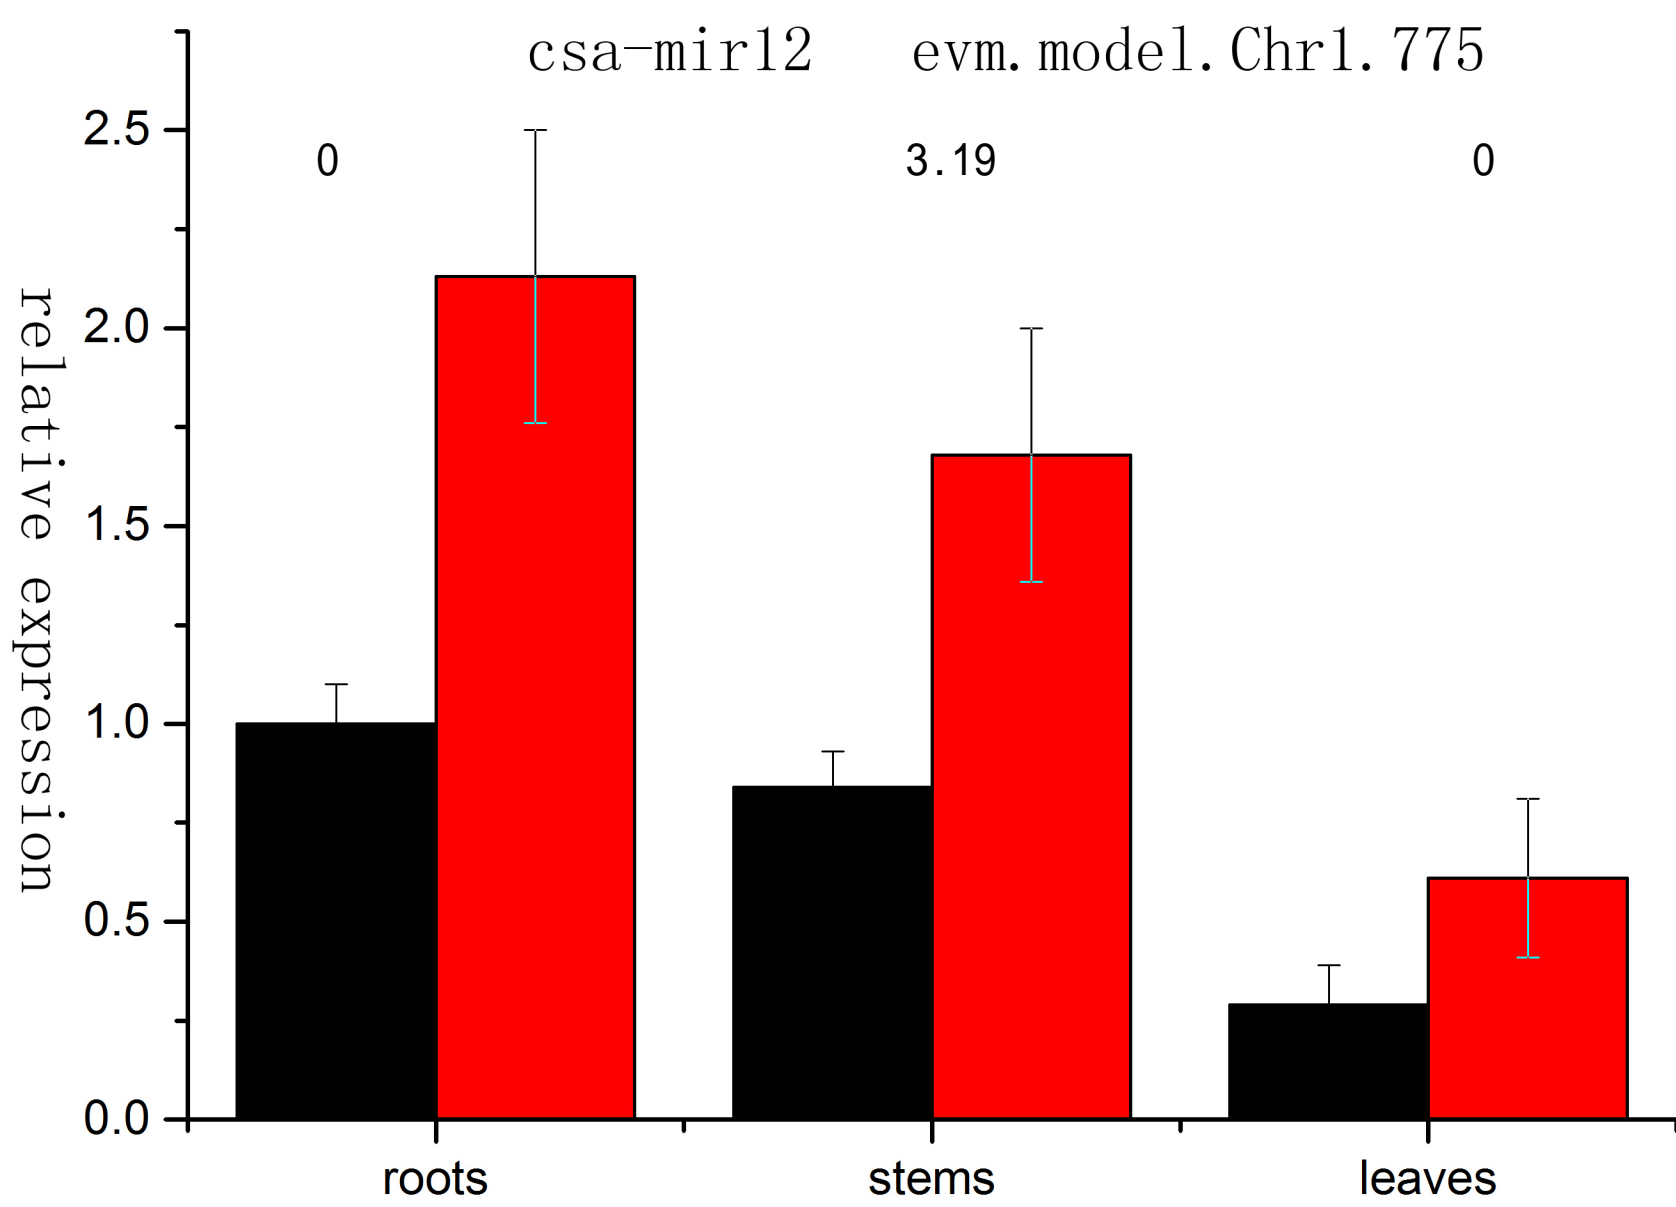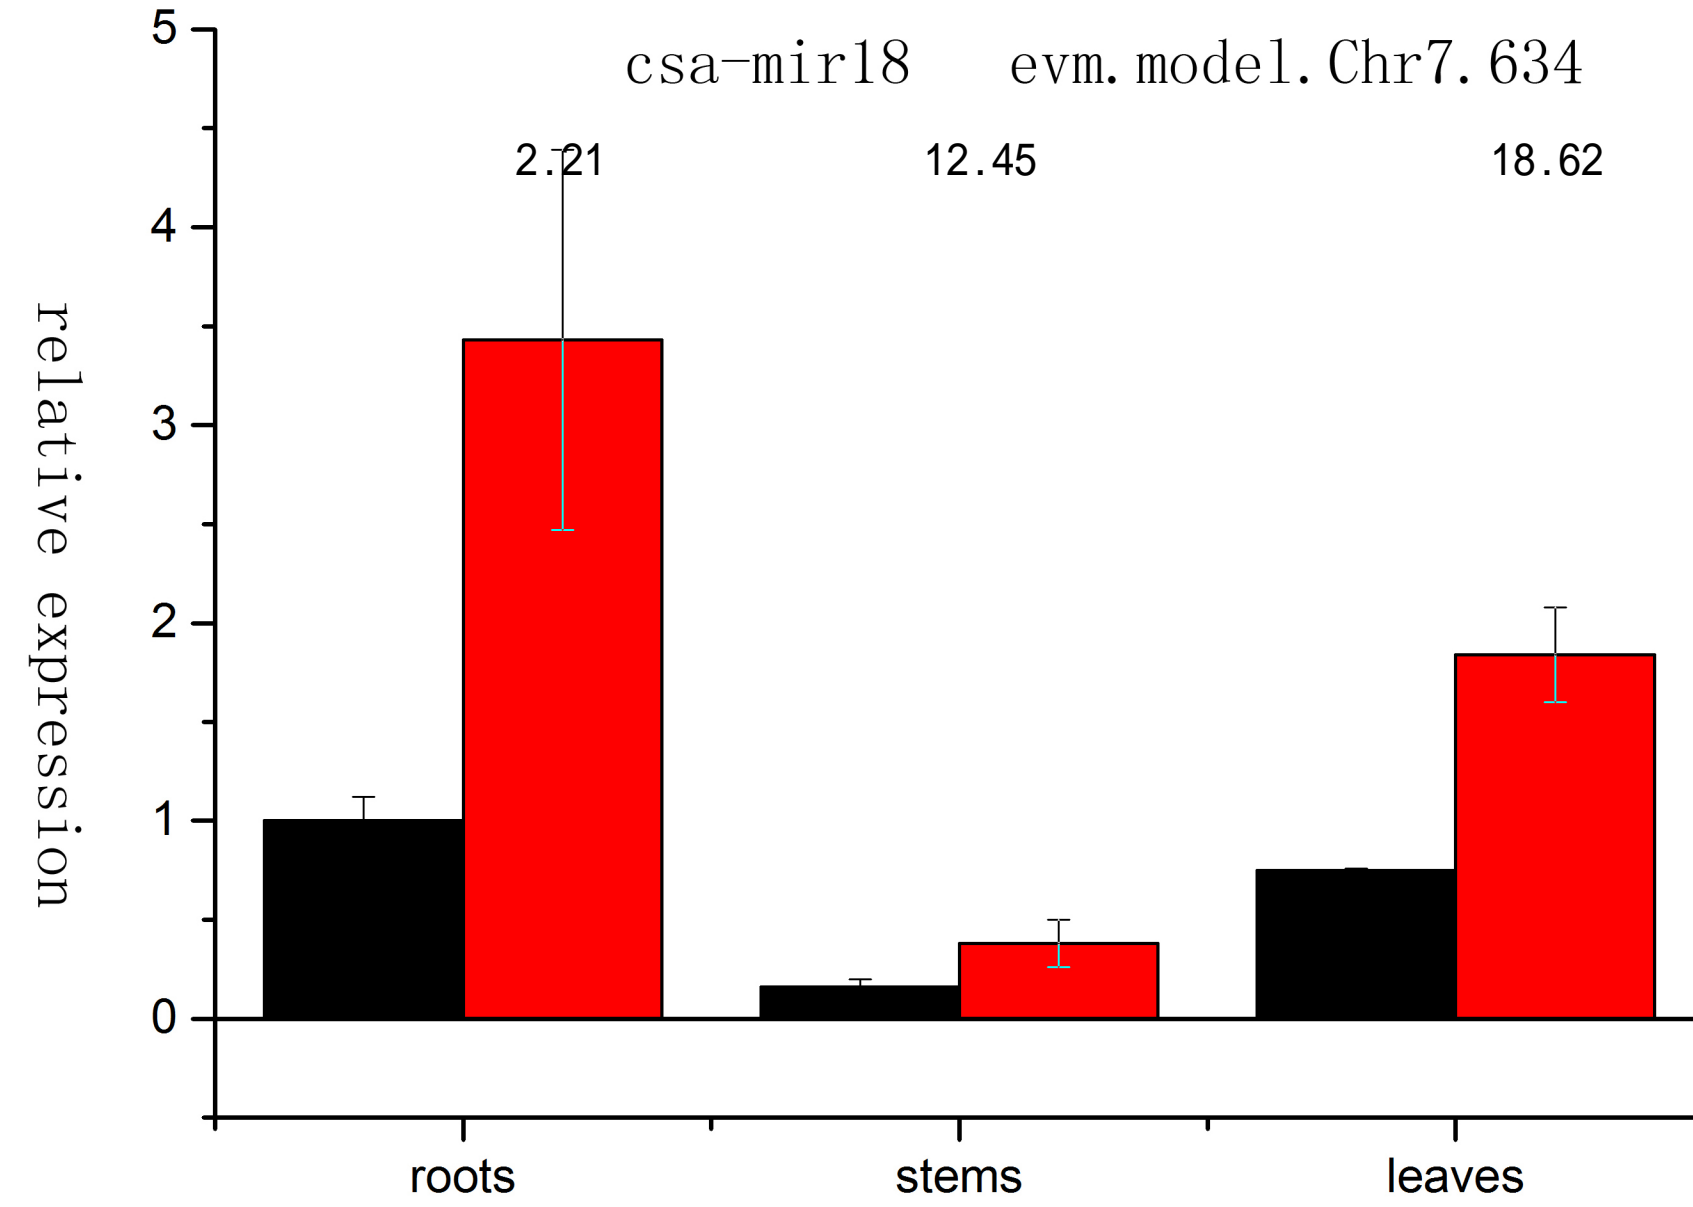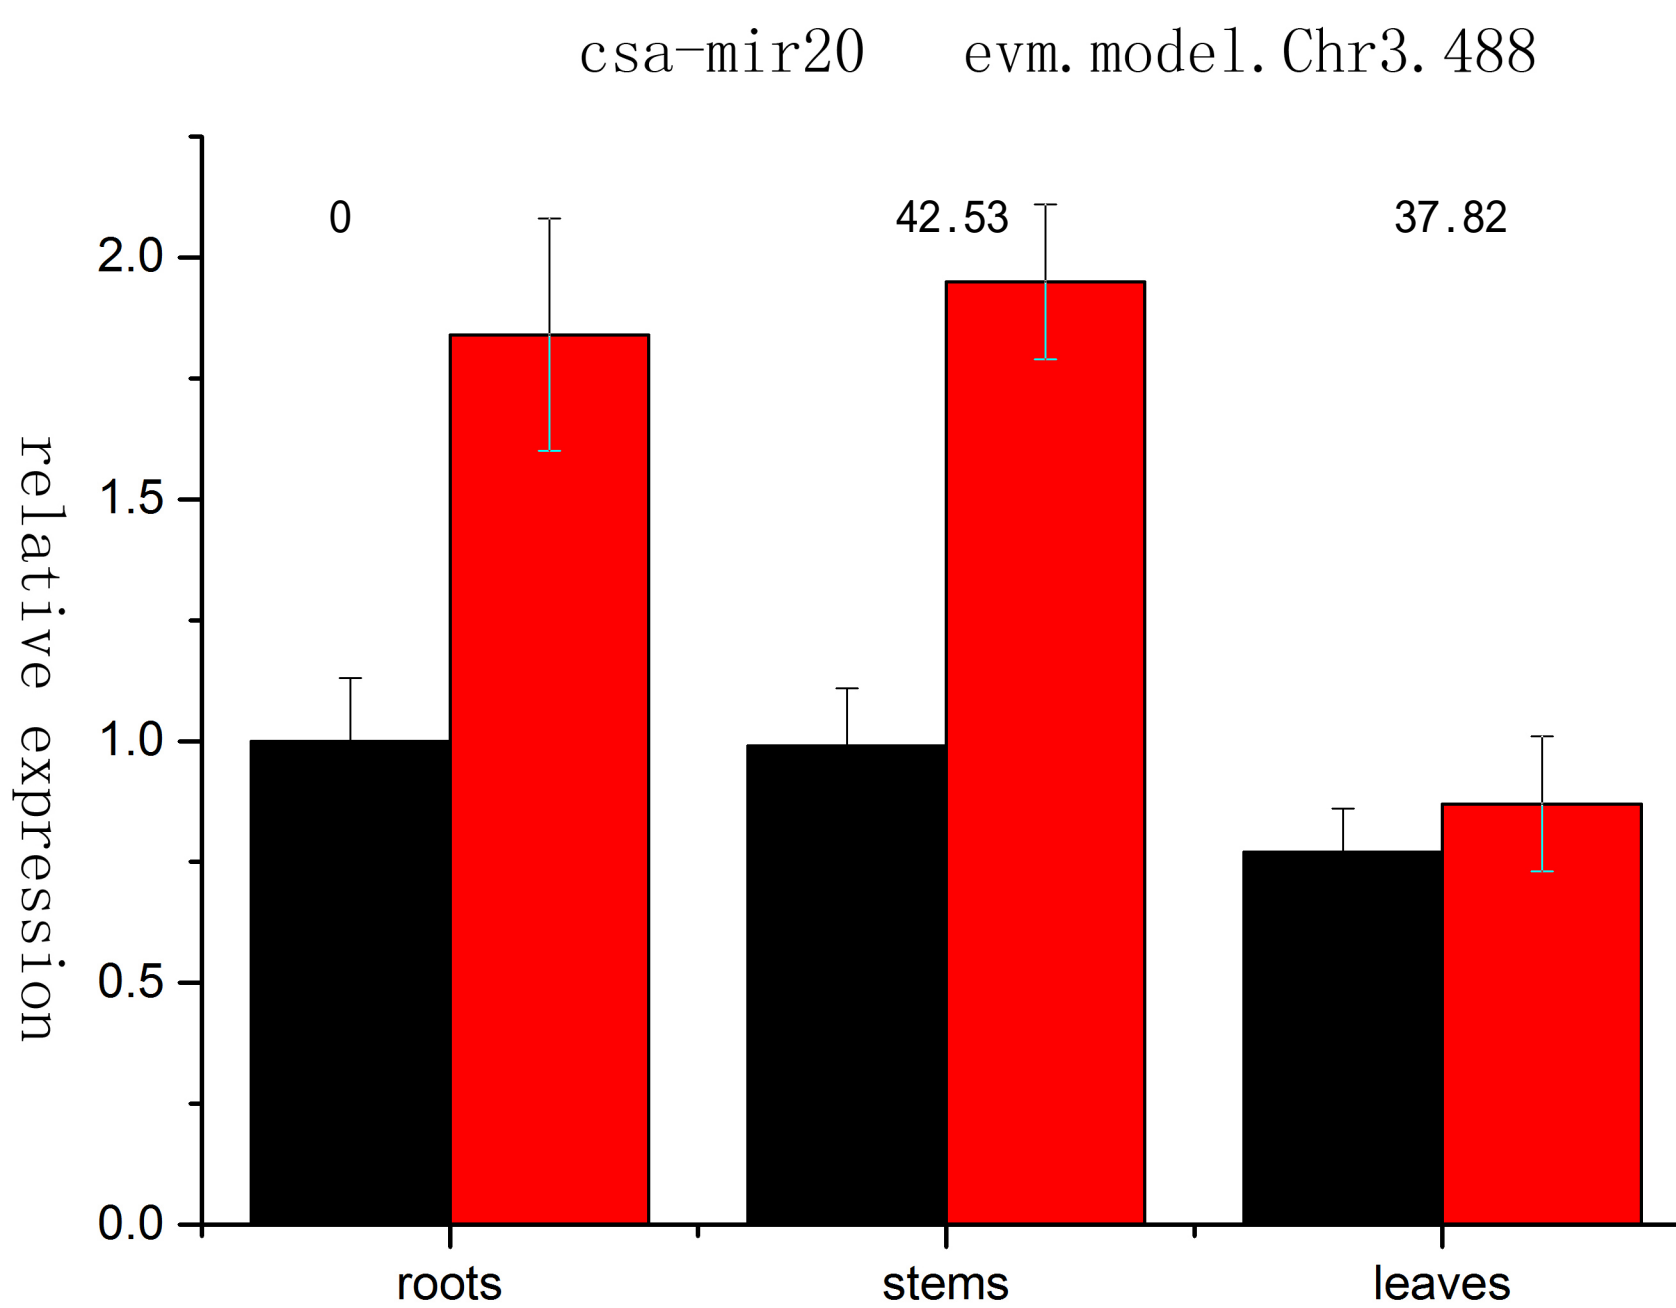

Supplement: 12864_2017_3665_MOESM9_ESM.pdf [file 12864_2017_3665_MOESM9_ESM.pdf]
