# Supplementary material for: Genome-wide analysis of microRNA targeting impacted by SNPs in cucumber genome
Source: PubMed Central journal article supplement (PMC5379521; doi:10.1186/s12864-017-3665-y), 2017-04-04
Supplement: 12864_2017_3665_MOESM10_ESM.pdf [file 12864_2017_3665_MOESM10_ESM.pdf]

# SNP in miR166 mature sequence

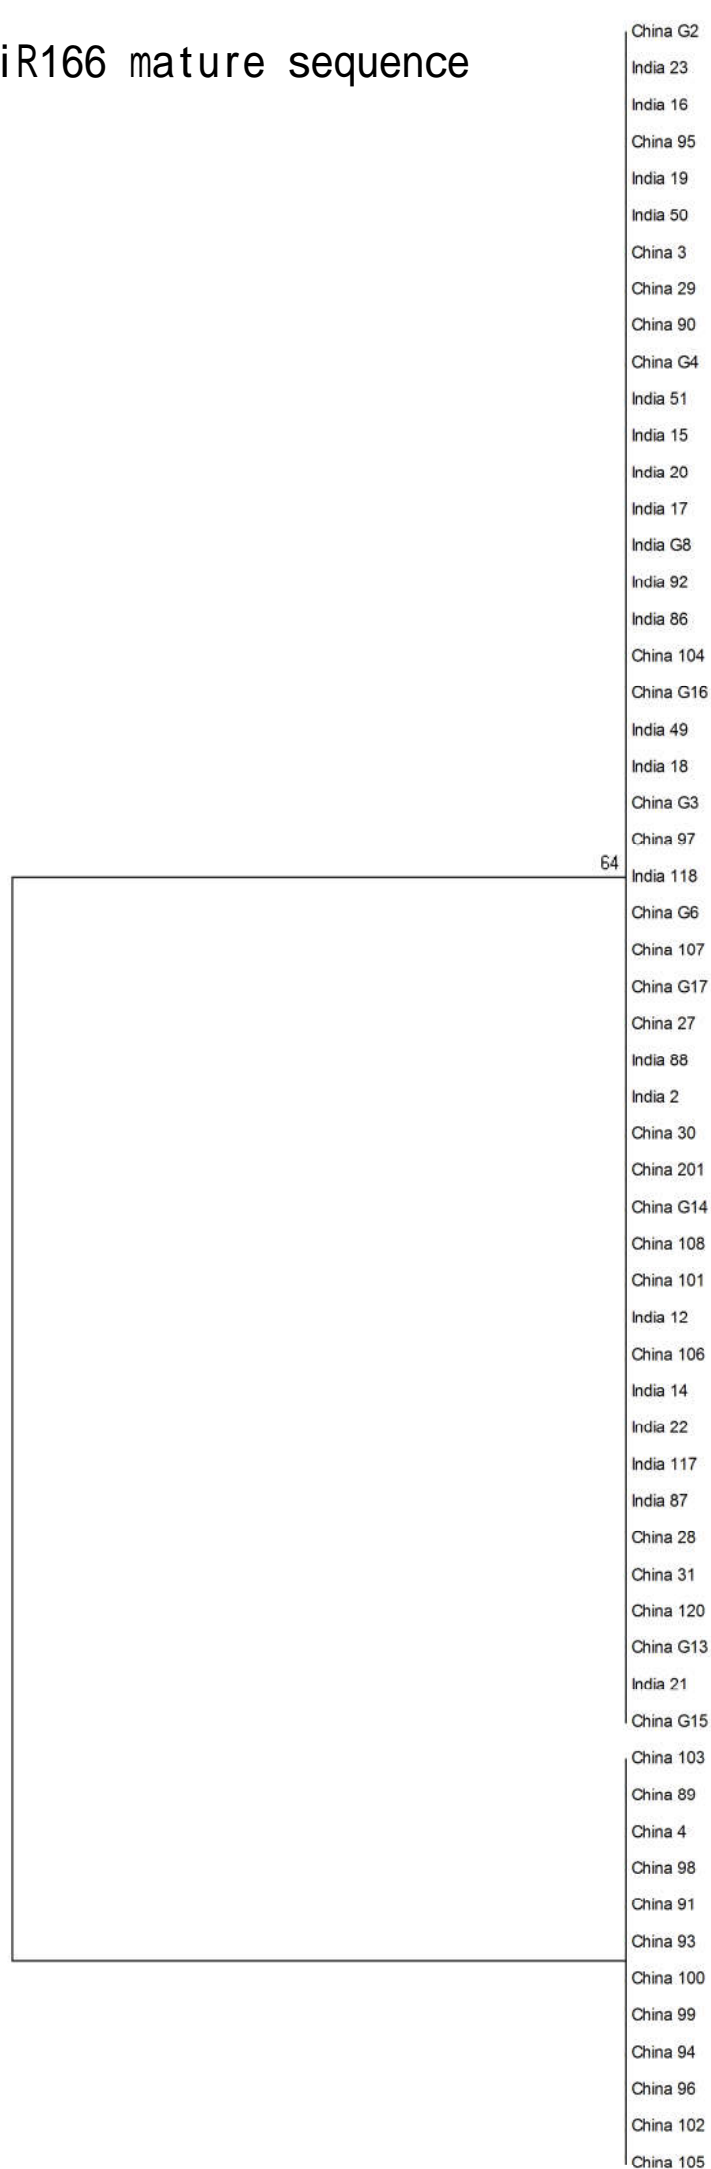

# SNP in miRNA162-target site

China G13  
India 18  
India 51  
China 28  
China 101  
China 95  
China 97  
China 91  
China 93  
China 96  
China 120  
China 90  
China 105  
China G14  
India 118  
China 30  
China G4  
China 94  
India 117  
China 4  
China 99  
China 100  
China 106  
China G15  
China 108  
China 201  
China 102  
India 50  
China 3  
China 103  
China 29  
China 98  
China 104  
China 31  
India 14  
China G2  
China G16  
India 12  
China G3  
China G6  
China 27  
India 21  
China G17  
China 89  
China 107  
India 23  
India 87  
India 86  
India 88  
India 49  
India 16  
India 20  
India G8  
India 15  
India 22  
India 19  
India 17  
India 2  
India 92

63

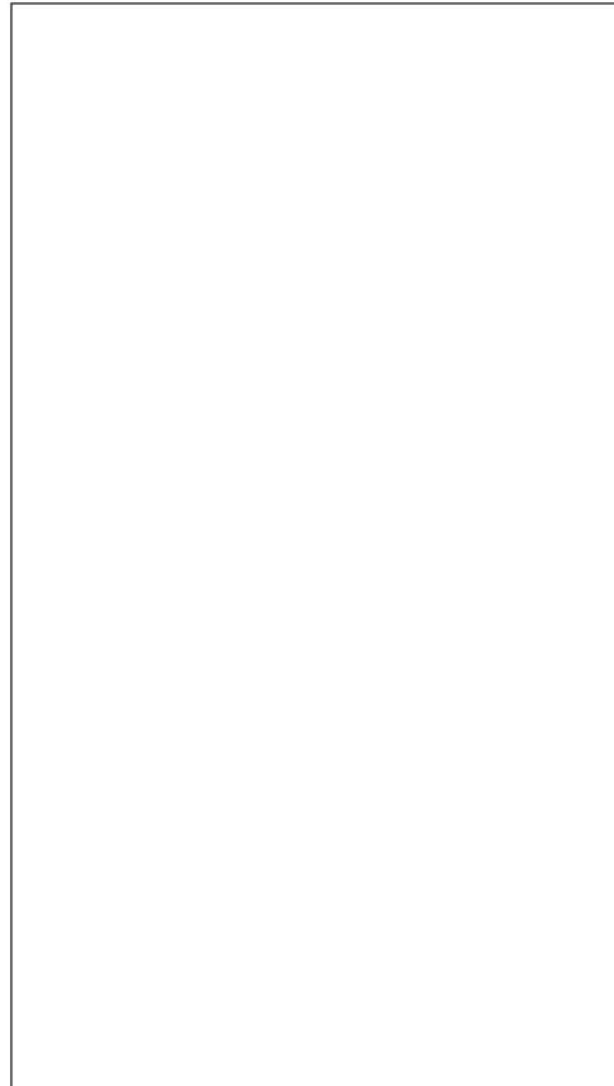

0.005
